# Supplementary material
Source: PubMed Central journal article supplement (PMC2732435)
Supplement: NIHMS91435-supplement-1_si_001.pdf [file NIHMS91435-supplement-1_si_001.pdf]

**Conversion of Allylic Alcohols to Stereodefined  
Trisubstituted Alkenes: A Complementary Process to the  
Claisen Rearrangement**

Justin K. Belardi and Glenn C. Micalizio\*

*Department of Chemistry, Yale University, New Haven, CT 06520-8107*

E-mail: [glenn.micalizio@yale.edu](mailto:glenn.micalizio@yale.edu)

**SUPPORTING INFORMATION:**

**General.** All reactions were conducted in flame-dried glassware under nitrogen using anhydrous solvents. Tetrahydrofuran, diethyl ether, and dimethylformamide were used after passing through activated alumina columns. Vinyltrimethylsilane and chlorovinyltrimethylsilane were distilled prior to use. All other commercially available reagents were used as received.

<sup>1</sup>H NMR data were recorded at 500 MHz or 400 MHz using a Bruker AM-500, Bruker Avance DPX-500 or Bruker AM-400 instrument. <sup>1</sup>H NMR chemical shifts are reported relative to residual CHCl<sub>3</sub> (7.26 ppm). <sup>13</sup>C NMR data were recorded at 126 MHz using a Bruker AM-500 or Bruker Avance DPX-500 instrument. <sup>13</sup>C chemical shifts are reported relative to the central line of CDCl<sub>3</sub> (77.0 ppm). Infrared spectra were recorded using a Thermo Electron Nicolet 6700 FT-IR Spectrometer. Low resolution mass spectrometry was performed on an Agilent Technologies 6890 Network GC System with a 5973 Network Mass Selective Detector. Optical rotations were measured on Perkin Elmer Model 341 polarimeter using a 1 mL capacity micro cell with a 10 cm path length. Chromatographic purifications were performed using 60Å, 35-75µm particle size silica gel from Silicycle. All compounds purified by chromatography were sufficiently pure for use in further experiments, unless indicated otherwise. Semi-preparative and analytical HPLC normal phase separations were performed using an HPLC system composed of two Dynamax SD-1 pumps, a Rheodyne injector and a Dynamax UV-1 absorbance detector.

**General procedure for reductive cross-coupling reactions between allylic alcohols and vinyltrimethylsilane:** To a flame-dried flask equipped with a magnetic stir-bar and flushed with argon was added the allylic alcohol (0.34 equiv) in THF (0.5M). The solution was cooled to  $-78\text{ }^{\circ}\text{C}$  and *n*-BuLi (2.5M in hexanes, 0.4 equiv) was added dropwise over 2 min. This solution was rapidly warmed to  $0\text{ }^{\circ}\text{C}$  and stirred at that temperature for 15 min. After recooling to  $-78\text{ }^{\circ}\text{C}$ , vinyltrimethylsilane (1.0 eq) was added as a 0.1M solution in diethylether. To this solution was added  $\text{ClTi}(\text{O}i\text{-Pr})_3$  (1.0 M in hexanes; 1.0 equiv), and *c*- $\text{C}_5\text{H}_9\text{MgCl}$  (2.0M in diethyl ether; 2.0 equiv). The resulting yellow solution was slowly warmed to  $0\text{ }^{\circ}\text{C}$  over 2 h, during which time it became a thick brown mixture. After stirring at  $0\text{ }^{\circ}\text{C}$  for 30 min, the mixture was quenched with 1N HCl (~ 3 mL) and stirred rapidly for 20 min at rt. This solution was filtered through a pad of silica gel to remove water and titanium salts and the silica gel was subsequently rinsed with 150 ml of EtOAc. After concentration *in vacuo*, the NMR of the crude material was taken to determine selectivity. Finally, the crude material was purified by flash column chromatography on silica gel to provide coupled product.

Note: It has been observed that warming the combined reaction mixture to  $0\text{ }^{\circ}\text{C}$  rapidly typically results in an increase in the amount of regioisomeric impurities derived from alkylation at the internal carbon of the allylic alcohol in upwards of 32%.

**General procedure for reductive cross-coupling reactions between allylic alcohols and chlorodimethylvinylsilane:** To a flame-dried flask equipped with a magnetic stir-bar and flushed with argon at  $-78\text{ }^{\circ}\text{C}$  was added chlorodimethylvinylsilane (1.0 equiv; as a 0.1M solution in diethylether),  $\text{ClTi}(\text{O}i\text{-Pr})_3$  (1.0 equiv, 1.0 M in hexanes) and *c*- $\text{C}_5\text{H}_9\text{MgCl}$  (2.0 equiv; 2.0M in diethyl ether). The solution was allowed to rapidly warm to  $-50\text{ }^{\circ}\text{C}$ , then

maintained at this temperature for 2 h before cooling  $-78\text{ }^{\circ}\text{C}$ . During this time the solution turned from a bright yellow color to dark brown.

To a separate flame-dried flask equipped with a magnetic stir-bar and flushed with argon was added the allylic alcohol (0.34 equiv) in THF (0.5M). The solution was cooled to  $-78\text{ }^{\circ}\text{C}$  and *n*-BuLi (0.4 equiv, 2.5M in hexanes) was added dropwise over 2 min. This solution was rapidly warmed to  $0\text{ }^{\circ}\text{C}$  and stirred for 15 min before being transferred to the preformed dark brown mixture via cannula.

The combined solution was then slowly warmed to  $0\text{ }^{\circ}\text{C}$  over 2 h. After stirring at  $0\text{ }^{\circ}\text{C}$  for 30 min, the mixture was quenched with 1N HCl and stirred rapidly for 20 min at rt. The mixture was quenched with 1N HCl ( $\sim 3\text{ mL}$ ) and stirred rapidly for 20 min at rt. This solution was filtered through a pad of silica gel to remove water and titanium salts and the silica gel was subsequently rinsed with 150 ml of EtOAc. After concentration *in vacuo*, the NMR of the crude material was taken to determine selectivity. The crude material was then purified by flash column chromatography on silica gel to provide pure product.

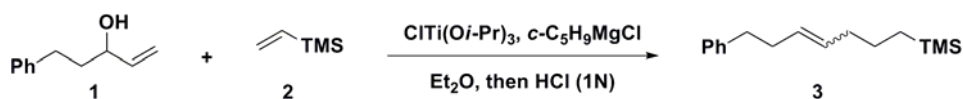

**Synthesis of 1-trimethylsilyl-7-phenyl-4-heptene, 3:** To a flame-dried flask equipped with a magnetic stir-bar and flushed with argon was added the allylic alcohol **1** (100 mg, 0.62 mmol) in THF (1.0 mL). The solution was cooled to  $-78\text{ }^{\circ}\text{C}$ , and *n*-BuLi (290  $\mu\text{L}$ , 2.5M in hexanes, 0.72 mmol) was added dropwise over 2 min. The solution was rapidly warmed to  $0\text{ }^{\circ}\text{C}$ , stirred for 15 min, then cooled to  $-78\text{ }^{\circ}\text{C}$ . Ether (18 mL), vinyltrimethylsilane **2** (280  $\mu\text{L}$ , 1.8 mmol), CITi(Oi-Pr)<sub>3</sub> (1.8 mL, 1.0 M in hexanes, 1.8 mmol), and *c*-C<sub>5</sub>H<sub>9</sub>MgCl (1.8 mL, 2.0M in

diethyl ether; 3.6 mmol) were then added sequentially to the cold solution. This solution was then slowly warmed to 0 °C over 2 h, during which time it became a thick brown mixture. After stirring at 0 °C for 30 min, the mixture was quenched with 1N HCl (3 mL) and stirred rapidly for 20 min at rt. This solution was filtered through a pad of silica gel to remove water and titanium salts and the silica gel was subsequently rinsed with 150 ml of EtOAc. After concentration *in vacuo*, the NMR of the crude material indicated that the product was formed as a 1:1 mixture of (*E*) and (*Z*) olefin isomers. The crude material was then purified by flash column chromatography on silica gel to provide product **3** (100 mg, 0.41 mmol) in 66% yield as a mixture of olefin isomers.

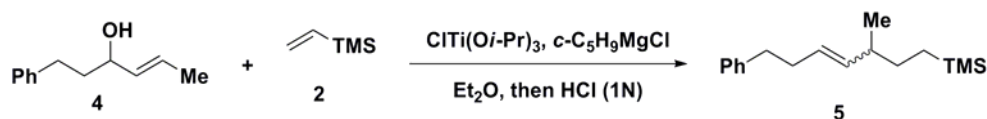

**Synthesis of 1-trimethylsilyl-7-phenyl-3-methyl-4-heptene, 5:** To a flame-dried flask equipped with a magnetic stir-bar and flushed with argon was added the allylic alcohol **4** (100 mg, 0.57 mmol) in THF (1.0 mL). The solution was cooled to -78 °C, and *n*-BuLi (267 μL, 2.5M in hexanes, 0.67 mmol) was added dropwise over 2 min. The solution was rapidly warmed to 0 °C, stirred for 15 min, then cooled to -78 °C. Ether (16 mL), vinyltrimethylsilane **2** (258 μL, 1.7 mmol), ClTi(O*i*-Pr)<sub>3</sub> (1.7 mL, 1.0 M in hexanes, 1.7 mmol), and *c*-C<sub>5</sub>H<sub>9</sub>MgCl (1.7 mL, 2.0M in diethyl ether; 3.4 mmol) were then added sequentially to the cold solution. This solution was then slowly warmed to 0 °C over 2 h, during which time it became a thick brown mixture. After stirring at 0 °C for 30 min, the mixture was quenched with 1N HCl (5 mL) and stirred rapidly for 20 min at rt. This solution

was filtered through a pad of silica gel to remove water and titanium salts and the silica gel was subsequently rinsed with 150 ml of EtOAc. After concentration *in vacuo*, the NMR of the crude material indicated that the product was formed as a 1:1 mixture of (*E*) and (*Z*) olefin isomers. The crude material was then purified by flash column chromatography on silica gel to provide product **5** (86 mg, 0.33 mmol) in 58% yield as a mixture of olefin isomers.

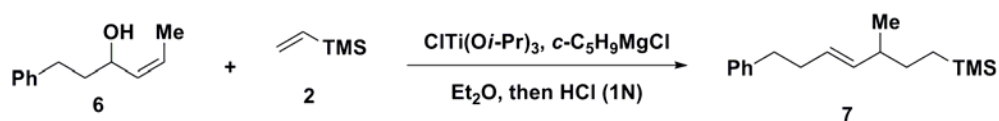

**Synthesis of (*E*)-1-trimethylsilyl-7-phenyl-3-methyl-4-heptene, **7**:** To a flame-dried flask equipped with a magnetic stir-bar and flushed with argon was added the allylic alcohol **6** (100 mg, 0.57 mmol) in THF (1.0 mL). The solution was cooled to  $-78\text{ }^{\circ}\text{C}$ , and *n*-BuLi (267  $\mu\text{L}$ , 2.5M in hexanes, 0.67 mmol) was added dropwise over 2 min. The solution was rapidly warmed to  $0\text{ }^{\circ}\text{C}$ , stirred for 15 min, then cooled to  $-78\text{ }^{\circ}\text{C}$ . Ether (16 mL), vinyltrimethylsilane **2** (258  $\mu\text{L}$ , 1.7 mmol), ClTi(O*i*-Pr)<sub>3</sub> (1.7 mL, 1.0 M in hexanes, 1.7 mmol), and *c*-C<sub>5</sub>H<sub>9</sub>MgCl (1.7 mL, 2.0M in diethyl ether; 3.4 mmol) were then added sequentially to the cold solution. This solution was then slowly warmed to  $0\text{ }^{\circ}\text{C}$  over 2 h, during which time it became a thick brown mixture. After stirring at  $0\text{ }^{\circ}\text{C}$  for 30 min, the mixture was quenched with 1N HCl (3 mL) and stirred rapidly for 20 min at rt. This solution was filtered through a pad of silica gel to remove water and titanium salts and the silica gel was subsequently rinsed with 150 ml of EtOAc. After concentration *in vacuo*, the NMR of the crude material was taken to determine selectivity (*E*:*Z* = 9:1). Purification of this material by

flash column chromatography on silica gel then delivered **7** (95 mg, 0.33 mmol) in 64% yield as a 9:1 mixture of olefin isomers.

**Data for (*E*)-1-trimethylsilyl-7-phenyl-3-methyl-4-heptene, **7**:**  $^1\text{H}$  NMR (500 MHz,  $\text{CDCl}_3$ )  $\delta$  7.32-7.15 (m, 5H), 5.44-5.32 (m, 1H), 5.26 (dd,  $J = 15.4, 7.6$  Hz, 1H), 2.72-2.64 (m, 2H), 2.36-2.28 (m, 2H), 2.00-1.92 (m, 1H), 1.28-1.16 (m, 2H), 0.94 (d,  $J = 6.6$  Hz, 3H), 0.48-0.34 (m, 2H);  $^{13}\text{C}$  NMR (126 MHz,  $\text{CDCl}_3$ )  $\delta$  137.1, 136.4, 128.5, 128.2, 127.7, 125.6, 39.7, 36.2, 34.4, 31.2, 20.3, 14.0, -1.7; IR (thin film, NaCl) 3064, 2953, 2912, 2870, 1605, 1496, 1453, 1247, 967, 863, 834, 746, 697  $\text{cm}^{-1}$ ; LRMS (EI,  $\text{M}^+$ ), calcd for  $\text{C}_{17}\text{H}_{28}\text{Si}$ , 260.20  $m/z$  ( $\text{M}^+$ ); observed, 260.2 ( $\text{M}^+$ )  $m/z$ .

**nOe's for (*E*)-1-trimethylsilyl-7-phenyl-3-methyl-4-heptene, **7**:**

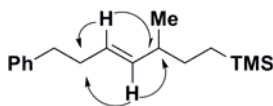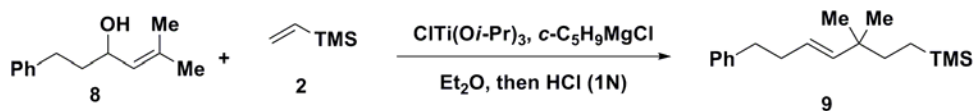

**Synthesis of (*E*)-(1-trimethylsilyl-3,3-dimethyl-7-phenyl-4-heptene, **9**:** To a flame-dried flask equipped with a magnetic stir-bar and flushed with argon was added the allylic alcohol **8** (100 mg, 0.53 mmol) in THF (1.0 mL). The solution was cooled to  $-78$   $^\circ\text{C}$ , and  $n\text{-BuLi}$  (246  $\mu\text{L}$ , 2.5M in hexanes, 0.62 mmol) was added dropwise over 2 min. The solution was rapidly warmed to  $0$   $^\circ\text{C}$ , stirred for 15 min and cooled to  $-78$   $^\circ\text{C}$ . Ether (16 mL), vinyltrimethylsilane **2** (239  $\mu\text{L}$ , 1.5 mmol),  $\text{CITi}(\text{O}i\text{-Pr})_3$  (1.5 mL, 1.0 M in hexanes, 1.5 mmol), and  $c\text{-C}_5\text{H}_9\text{MgCl}$  (1.5 mL, 2.0M in diethyl ether; 3.0 mmol) were then added sequentially to the cold solution. The yellow solution was slowly warmed to  $0$   $^\circ\text{C}$  over 2 h, during which time it became a thick

brown mixture. After stirring at 0 °C for 30 min, the mixture was quenched with 1N HCl (3 mL) and stirred rapidly for 20 min at rt. This solution was filtered through a pad of silica gel to remove water and titanium salts and the silica gel was subsequently rinsed with 150 ml of EtOAc. After concentration *in vacuo*, the NMR of the crude product was taken to determine selectivity (*E*:*Z* ≥ 20:1). Finally, this material was purified by flash column chromatography on silica gel eluting with hexanes to provide product **9** (101 mg, 0.37 mmol) in 69% yield.

**Data for (*E*)-1-trimethylsilyl-3,3-dimethyl-7-phenyl-4-heptene, **9**:** <sup>1</sup>H NMR (500 MHz, CDCl<sub>3</sub>) δ 7.30-7.16 (m, 5H), 5.34-5.30 (m, 2H), 2.70 (t, *J* = 7.4 Hz, 2H), 2.36-2.30 (m, 2H), 1.21-1.16 (m, 2H), 0.92 (s, 6H), 0.35-0.30 (m, 2H), -0.03 (s, 9H); <sup>13</sup>C NMR (126 MHz, CDCl<sub>3</sub>) δ 142.2, 140.9, 128.5, 128.2, 125.6, 125.3, 37.0, 36.4, 36.4, 34.6, 26.8, 10.6, -1.8; IR (thin film, NaCl) 3027, 2954, 1454, 1381, 1248, 1184, 1031, 973, 863, 835, 746, 698 cm<sup>-1</sup>; LRMS (EI, M<sup>+</sup>); calcd for C<sub>18</sub>H<sub>30</sub>Si, 274.21 *m/z* (M)<sup>+</sup>; observed, 274.3 (M)<sup>+</sup> *m/z*.

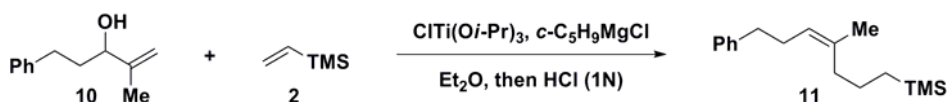

**Synthesis for (*Z*)-1-trimethylsilyl-4-methyl-7-phenyl-4-heptene, **11**:** To a flame-dried flask equipped with a magnetic stir-bar and flushed with argon was added the allylic alcohol **10** (100 mg, 0.57 mmol) in THF (1.0 mL). The solution was cooled to -78 °C, and *n*-BuLi (268 μL, 2.5M in hexanes, 0.67 mmol) was added dropwise over 2 min. The solution was rapidly warmed to 0 °C, stirred for 15 min and cooled to -78 °C. Ether (17 mL), vinyltrimethylsilane **2** (263 μL, 1.7 mmol), ClTi(Oi-Pr)<sub>3</sub> (1.7 mL, 1.0 M in hexanes, 1.7 mmol), and *c*-C<sub>5</sub>H<sub>9</sub>MgCl (1.7 mL, 2.0M in diethyl ether; 3.4 mmol) were then added sequentially to the cold solution.



The resulting yellow solution was slowly warmed to 0 °C over 2 h, during which time it became a thick brown mixture. After stirring at 0 °C for 30 min, the mixture was quenched with 1N HCl (3 mL) and stirred rapidly for 20 min at rt. This solution was filtered through a pad of silica gel to remove water and titanium salts and the silica gel was subsequently rinsed with 150 ml of EtOAc. After concentration *in vacuo*, the NMR of the crude material was taken to determine selectivity (*Z*:*E* ≥ 20:1). This material was then purified by flash column chromatography on silica gel eluting with hexanes to provide product **11** (74 mg, 0.28 mmol) in 50% yield. The product was further purified by HPLC (eluting in hexanes) to furnish a sample of **11** suitable for characterization.

**Data for (Z)-1-trimethylsilyl-4-methyl-7-phenyl-4-heptene, 11:** <sup>1</sup>H NMR (500 MHz, CDCl<sub>3</sub>) δ 7.31-7.16 (m, 5H), 5.20 (t, *J* = 7.2 Hz, 1H), 2.63 (t, *J* = 7.8 Hz, 2H), 2.31 (app q, *J* = 7.2 Hz, 2H), 2.01 (t, *J* = 7.6 Hz, 2H), 1.67 (d, *J* = 0.9 Hz, 3H), 1.39-1.30 (m, 2H), 0.49-0.42 (m, 2H), -0.02 (s, 9H); <sup>13</sup>C NMR (126 MHz, CDCl<sub>3</sub>) δ 142.4, 136.1, 128.4, 128.2, 125.7, 124.4, 36.5, 35.6, 30.0, 23.4, 22.3, 16.6, -1.7; IR (thin film, NaCl) 3027, 2953, 2924, 2858, 1496, 1453, 1248, 836, 746, 697 cm<sup>-1</sup>; LRMS (EI, M<sup>+</sup>); calcd for C<sub>17</sub>H<sub>28</sub>Si, 260.20 *m/z* (M)<sup>+</sup>; observed, 260.1 (M)<sup>+</sup> *m/z*.

**nOe's for (Z)-1-trimethylsilyl-4-methyl-7-phenyl-4-heptene, 11:**

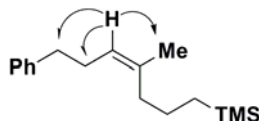

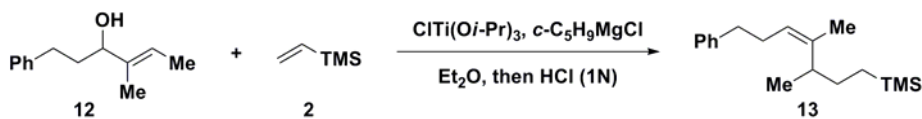

**Synthesis of (Z)-1-trimethylsilyl-3,4-dimethyl-7-phenyl-4-heptene, 13:** To a flame-dried flask equipped with a magnetic stir-bar and flushed with argon was added the allylic alcohol **12** (100 mg, 0.52 mmol) in THF (1.0 mL). The solution was cooled to  $-78\text{ }^{\circ}\text{C}$ , and *n*-BuLi (246  $\mu\text{L}$ , 2.5M in hexanes, 0.62 mmol) was added dropwise over 2 min. The solution was rapidly warmed to  $0\text{ }^{\circ}\text{C}$ , stirred for 15 min and cooled to  $-78\text{ }^{\circ}\text{C}$ . Ether (15 mL), vinyltrimethylsilane **2** (239  $\mu\text{L}$ , 1.5 mmol), ClTi(Oi-Pr)<sub>3</sub> (1.5 mL, 1.0 M in hexanes, 1.5 mmol), and *c*-C<sub>5</sub>H<sub>9</sub>MgCl (1.5 mL, 2.0M in diethyl ether; 3.0 mmol) were then added sequentially to the cold solution. The resulting yellow solution was slowly warmed to  $0\text{ }^{\circ}\text{C}$  over 2 h, during which time it became a thick brown mixture. After stirring at  $0\text{ }^{\circ}\text{C}$  for 30 min, the mixture was quenched with 1N HCl (3 mL) and stirred rapidly for 20 min at rt. This solution was filtered through a pad of silica gel to remove water and titanium salts and the silica gel was subsequently rinsed with 150 ml of EtOAc. After concentration *in vacuo*, the NMR of the crude material was taken to determine selectivity (*Z*:*E*  $\geq$  20:1). Finally, this material was purified by flash column chromatography on silica gel eluting with hexanes to provide product **13** (93 mg, 0.34 mmol) in 65% yield. The product was further purified by HPLC (eluting in hexanes) to furnish a sample of **13** suitable for characterization.

**Data for (Z)-1-trimethylsilyl-3,4-dimethyl-7-phenyl-4-heptene, 13:** <sup>1</sup>H NMR (500 MHz, CDCl<sub>3</sub>)  $\delta$  7.30-7.15 (m, 5H), 5.21 (t, *J* = 7.0 Hz, 1H), 2.63 (t, *J* = 7.9 Hz, 2H), 2.50 (dq, *J* = 13.9, 6.9 Hz, 1H), 2.40-2.28 (m, 2H), 1.53 (s, 3H), 1.24 (app. q, *J* = 8.2 Hz, 2H), 0.90 (d, *J* = 6.9 Hz, 3H), 0.38-0.29 (m, 2H), -0.04 (s, 9H); <sup>13</sup>C NMR (126 MHz, CDCl<sub>3</sub>)  $\delta$  142.4, 139.7, 128.4, 128.2, 125.7, 124.7, 37.2, 36.6, 29.4, 28.8, 19.0, 17.9, 14.6, -1.8; IR (thin film, NaCl)

3027, 2955, 2920, 2856, 1453, 1377, 1247, 862, 833, 697  $\text{cm}^{-1}$ ; LRMS (EI,  $\text{M}^+$ ); calcd for  $\text{C}_{18}\text{H}_{30}\text{Si}$ , 274.21  $m/z$  ( $\text{M}^+$ ); observed, 274.2 ( $\text{M}^+$ )  $m/z$ .

**nOe's for (Z)-1-trimethylsilyl-3,4-dimethyl-7-phenyl-4-heptene, 13:**

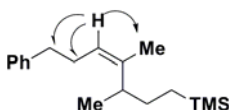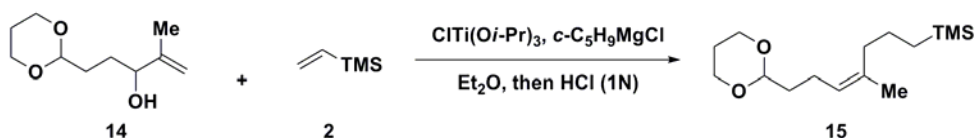

**Synthesis of (Z)-(7-(1,3-dioxan-2-yl)-4-methyl-1-trimethylsilyl-4-heptene, 15:** To a flame-dried flask equipped with a magnetic stir-bar and flushed with argon was added the allylic alcohol **14** (100 mg, 0.54 mmol) in THF (1.0 mL). The solution was cooled to  $-78$   $^\circ\text{C}$ , and *n*-BuLi (253  $\mu\text{L}$ , 2.5M in hexanes, 0.63 mmol) was added dropwise over 2 min. The solution was rapidly warmed to  $0$   $^\circ\text{C}$  and stirred for 15 min at this temperature before cooling to  $-78$   $^\circ\text{C}$ . Ether (16 mL), vinyltrimethylsilane **2** (244  $\mu\text{L}$ , 1.7 mmol),  $\text{ClTi}(\text{O}i\text{-Pr})_3$  (1.6 mL, 1.0 M in hexanes, 1.6 mmol), and  $c\text{-C}_5\text{H}_9\text{MgCl}$  (1.6 mL, 2.0M in diethyl ether; 3.2 mmol) were then added sequentially to the cooled solution. The resulting yellow solution was slowly warmed to  $0$   $^\circ\text{C}$  over 2 h, during which time it became a thick brown mixture. After stirring at  $0$   $^\circ\text{C}$  for 30 min, 1N HCl (3 mL) was added and the resulting solution was stirred rapidly for 20 min at rt. This solution was filtered through a pad of silica gel to remove water and titanium salts and the silica gel was subsequently rinsed with 150 ml of EtOAc. After concentration *in vacuo*, the NMR of the crude material was taken to determine selectivity ( $Z:E \geq 20:1$ ). The crude

material was then purified by flash column chromatography on silica gel (10% ethyl acetate-hexanes) to provide product **15** (90 mg, 0.33 mmol) in 62% yield.

**Data for (Z)-(7-(1,3-dioxan-2-yl)-4-methyl-1-trimethylsilyl-4-heptene, 15:**  $^1\text{H}$  NMR (500 MHz,  $\text{CDCl}_3$ )  $\delta$  5.10 (t,  $J = 7.6$  Hz, 1H), 4.49 (t,  $J = 5.0$  Hz, 1H), 4.09 (dd,  $J = 11.7, 5.0$  Hz, 2H), 3.74 (td,  $J = 12.3, 1.9$  Hz, 2H), 2.13-2.00 (m, 5H), 1.65 (s, 3H), 1.65-1.55 (m, 2H), 1.40-1.30 (m, 3H), 0.49-0.43 (m, 2H), -0.03 (s, 9H);  $^{13}\text{C}$  NMR (126 MHz,  $\text{CDCl}_3$ )  $\delta$  136.0, 124.3, 101.9, 66.9, 35.4, 25.9, 23.3, 22.3, 22.3, 16.5, -1.7; IR (thin film, NaCl) 2953, 2850, 1403, 1377, 1148, 1087, 1048, 1005, 942, 837, 692  $\text{cm}^{-1}$ ; LRMS (EI,  $\text{M}^+$ ); calcd for  $\text{C}_{15}\text{H}_{30}\text{O}_2\text{Si}$ , 270.20  $m/z$  ( $\text{M}^+$ ); observed, 270.1 ( $\text{M}^+$ )  $m/z$ .

**nOe's for (Z)-(7-(1,3-dioxan-2-yl)-4-methyl-1-trimethylsilyl-4-heptene, 15:**

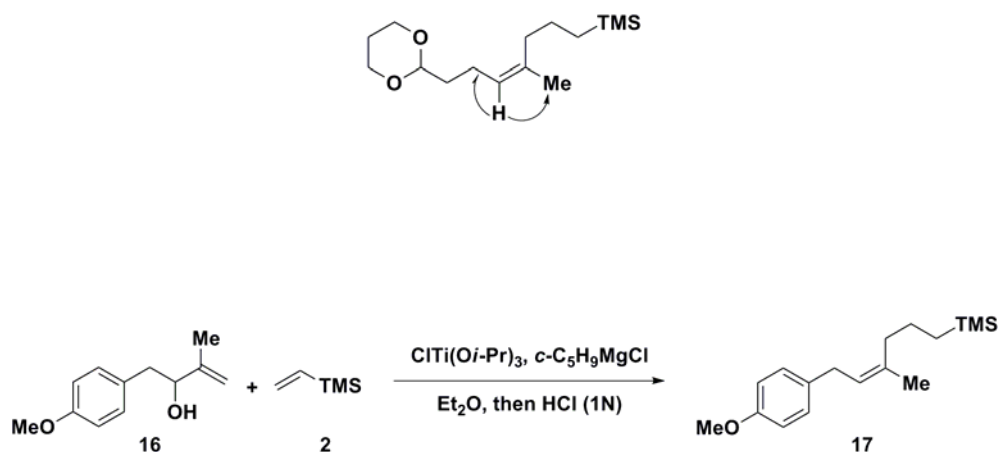

**Synthesis of (Z)-6-(4'-methoxyphenyl)-4-methyl-1-trimethylsilyl-4-hexene, 17:** To a flame-dried flask equipped with a magnetic stir-bar and flushed with argon was added the allylic alcohol **16** (100 mg, 0.52 mmol) in THF (1.0 mL). The solution was cooled to  $-78$   $^\circ\text{C}$ , and  $n\text{-BuLi}$  (243  $\mu\text{L}$ , 2.5M in hexanes, 0.61 mmol) was added dropwise over 2 min. The solution was rapidly warmed to  $0$   $^\circ\text{C}$  and stirred for 15 min, after which time it was cooled to  $-78$   $^\circ\text{C}$ . Ether (15 mL), vinyltrimethylsilane **2** (236  $\mu\text{L}$ , 1.5 mmol),  $\text{ClTi}(\text{O}i\text{-Pr})_3$  (1.5 mL, 1.0 M in hexanes, 1.5 mmol), and  $c\text{-C}_5\text{H}_9\text{MgCl}$  (1.5 mL, 2.0 M in diethyl ether; 3.0 mmol) were

then added sequentially to the cooled solution. The yellow solution was slowly warmed to 0 °C over 2 h, during which time it became a thick brown mixture. After stirring at 0 °C for 30 min, 1N HCl (3 mL) was added, and the mixture was stirred rapidly for 20 min at rt. This solution was filtered through a pad of silica gel to remove water and titanium salts and the silica gel was subsequently rinsed with 150 ml of EtOAc. After concentration *in vacuo*, the NMR of the crude material was taken to determine selectivity (*Z:E* ≥ 20:1). Finally, purification of this material by flash column chromatography on silica gel (2 % ethyl acetate-hexanes) afforded product **17** (102 mg, 0.37 mmol) in 71 % yield. The product was further purified by HPLC (2 % ethyl acetate/hexanes) to provide a sample of **17** suitable for characterization.

**Data for (Z)-6-(4'-methoxyphenyl)-4-methyl-1-trimethylsilyl-4-hexene, 17:** <sup>1</sup>H NMR (500 MHz, CDCl<sub>3</sub>) δ 7.09 (d, *J* = 8.8 Hz, 2H), 6.82 (d, *J* = 8.8 Hz, 2H), 5.31 (td, *J* = 7.3, 1.3 Hz, 1H), 3.78 (s, 3H), 3.29 (d, *J* = 7.6 Hz, 2H), 2.14 (t, *J* = 7.6 Hz, 2H), 1.71 (d, *J* = 1.3 Hz, 3H), 1.45-1.38 (m, 2H), 0.52-0.48 (m, 2H), -0.02 (s, 9H); <sup>13</sup>C NMR (126 MHz, CDCl<sub>3</sub>) δ 157.7, 136.2, 134.0, 129.2, 124.1, 113.8, 55.3, 35.6, 33.2, 23.4, 22.4, 16.7, -1.7; IR (thin film, NaCl) 2954, 1612, 1511, 1457, 1246, 1174, 1039, 836 cm<sup>-1</sup>; LRMS (EI, M<sup>+</sup>); calcd for C<sub>17</sub>H<sub>28</sub>OSi, 276.19 *m/z* (M)<sup>+</sup>; observed, 276.1 (M)<sup>+</sup> *m/z*.

**nOe's for (Z)-6-(4'-methoxyphenyl)-4-methyl-1-trimethylsilyl-4-hexene, 17:**

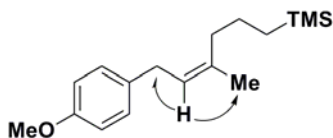

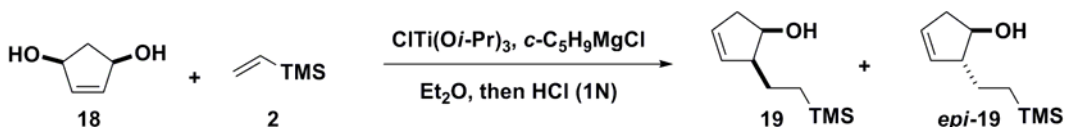

**Synthesis of *cis*-2-(1'-trimethylsilyl-eth-2'-yl)-cyclopent-3-en-1-ol, **19**:** To a flame-dried flask equipped with a magnetic stir-bar and flushed with argon was added diol **18** (100 mg, 1.0 mmol) in THF (1.0 mL). The solution was cooled to  $-78\text{ }^{\circ}\text{C}$ , and *n*-BuLi (938  $\mu\text{L}$ , 2.5M in hexanes, 2.4 mmol) was added dropwise over 2 min. The solution was rapidly warmed to  $0\text{ }^{\circ}\text{C}$  and stirred at this temperature for 15 min (turned into a white slurry). The mixture was then cooled to  $-78\text{ }^{\circ}\text{C}$  and diluted with diethylether (30 mL). Then vinyltrimethylsilane **2** (453  $\mu\text{L}$ , 2.9 mmol), ClTi(*Oi*-Pr)<sub>3</sub> (2.9 mL, 1.0 M in hexanes, 2.9 mmol), and *c*-C<sub>5</sub>H<sub>9</sub>MgCl (2.9 mL, 2.0M in diethyl ether; 5.8 mmol) were added sequentially to the cold solution. This yellow solution was slowly warmed to  $0\text{ }^{\circ}\text{C}$  over 2 h, during which time it became a thick brown mixture. After stirring at  $0\text{ }^{\circ}\text{C}$  for 30 min, 1N HCl (3 mL) was added, and stirring was continued for an additional 20 min at rt. This solution was filtered through a pad of silica gel to remove water and titanium salts and the silica gel was subsequently rinsed with 150 ml of EtOAc. After concentration *in vacuo*, the crude material was purified by flash column chromatography on silica gel (10% ethyl acetate-hexanes) to provide products **19** and *epi*-**19** (117 mg, 0.64 mmol) in 64% yield as a 5:1 mixture of diastereomers. Further purification on silica gel (5% ethyl acetate-hexanes) provided pure diastereomers **19** and *epi*-**19** for characterization.

**Data for *cis*-2-(1'-trimethylsilyl-eth-2'-yl)-cyclopent-3-en-1-ol, **19**:** <sup>1</sup>H NMR (500 MHz, CDCl<sub>3</sub>)  $\delta$  5.77-5.66 (m, 2H), 4.40-4.35 (m, 1H), 2.64-2.57 (m, 1H), 2.55-2.48 (m, 1H), 2.34-2.28 (m, 1H), 1.60-1.54 (m, 1H), 1.46-1.38 (m, 2H), 0.61-0.58 (m, 2H), -0.01 (s, 9H); <sup>13</sup>C NMR (126 MHz, CDCl<sub>3</sub>)  $\delta$  133.3, 127.9, 73.1, 53.4, 42.2, 21.9, 15.2, -1.8; IR (thin film,

NaCl) 3354, 3057, 2952, 1411, 1248, 1176, 1075, 1016, 835, 758, 690  $\text{cm}^{-1}$ ; LRMS (EI,  $\text{M}^+$ ); calcd for  $\text{C}_{10}\text{H}_{20}\text{OSi}$ , 184.13  $m/z$  ( $\text{M}^+$ ); observed, 184.2 ( $\text{M}^+$ )  $m/z$ .

**nOe's for *cis*-2-(1'-trimethylsilyl-eth-2'-yl)-cyclopent-3-en-1-ol, **19**:**

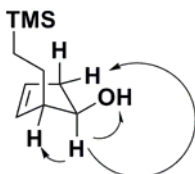

**Data for *trans*-2-(1'-trimethylsilyl-eth-2'-yl)-cyclopent-3-en-1-ol, *epi*-**19**:**  $^1\text{H}$  NMR (500 MHz,  $\text{CDCl}_3$ )  $\delta$  5.72-5.65 (m, 2H), 4.12-4.07 (m, 1H), 2.74-2.67 (m, 1H), 2.49-2.44 (m, 1H), 2.28-2.21 (m, 1H), 1.55 (d,  $J = 5.7$  Hz, 1H), 1.40-1.25 (m, 2H), 0.60-0.48 (m, 2H), -0.03 (s, 9H);  $^{13}\text{C}$  NMR (126 MHz,  $\text{CDCl}_3$ )  $\delta$  133.1, 127.7, 77.2, 58.3, 41.9, 27.3, 14.4, -1.8; IR (thin film, NaCl) 3336, 3054, 2951, 1419, 1248, 1181, 1066, 951, 863, 688  $\text{cm}^{-1}$ ; LRMS (EI,  $\text{M}^+$ ); calcd for  $\text{C}_{10}\text{H}_{20}\text{OSi}$ , 184.13  $m/z$  ( $\text{M}^+$ ); observed, 184.2 ( $\text{M}^+$ )  $m/z$ .

**nOe's for *trans*-2-(1'-trimethylsilyl-eth-2'-yl)-cyclopent-3-en-1-ol, *epi*-**19**:**

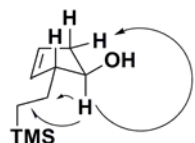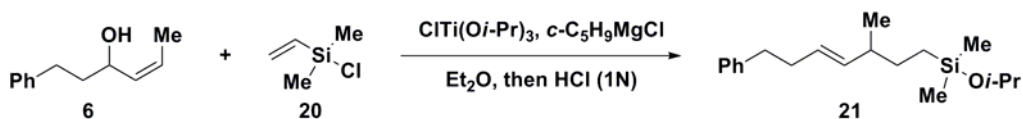

**Synthesis of (*E*)-isopropoxydimethyl(3-methyl-7-phenylhept-4-enyl)silane, **21**:** To a flame-dried flask equipped with a magnetic stir-bar and flushed with argon was added ether (17 mL) and chlorodimethylvinylsilane **20** (230  $\mu\text{L}$ , 1.7 mmol). The solution was cooled to  $-78$   $^{\circ}\text{C}$  and  $\text{ClTi}(\text{O}i\text{-Pr})_3$  (1.7 mL, 1.0 M in hexanes, 1.7 mmol) and  $c\text{-C}_5\text{H}_9\text{MgCl}$  (1.7 mL, 2.0

M in diethyl ether, 3.4 mmol) were added sequentially. The solution was rapidly warmed to –50 °C and stirred at this temperature for 2 h before cooling back to –78 °C (during this time the solution turned from a bright yellow color to dark brown).

To a separate flame-dried flask equipped with a magnetic stir-bar and flushed with argon was added the allylic alcohol **6** (100 mg, 0.57 mmol) in THF (1.0 mL). The solution was cooled to –78 °C, and *n*-BuLi (267  $\mu$ L, 2.5M in hexanes, 0.67 mmol) was added dropwise over 2 min. The solution was rapidly warmed to 0 °C and stirred for 15 min before being transferred via cannula to the dark brown mixture.

The combined brown solution was slowly warmed to 0 °C over 2 h. After stirring at 0 °C for 30 min, 1N HCl (3 mL) was added, and the mixture was stirred rapidly for 20 min at rt. This solution was filtered through a pad of silica gel to remove water and titanium salts and the silica gel was subsequently rinsed with 150 ml of EtOAc. After concentration *in vacuo*, the NMR of the crude material was taken to determine selectivity (*E*:*Z* = 10:1). The crude material was then purified by flash column chromatography on silica gel to provide product **21** (91 mg, 0.52 mmol) in 53% yield as a 10:1 mixture of olefin isomers. The product was characterized as this mixture.

**Data for (*E*)-isopropoxydimethyl(3-methyl-7-phenylhept-4-enyl)silane, **21**:** <sup>1</sup>H NMR (500 MHz, CDCl<sub>3</sub>)  $\delta$  7.30-7.14 (m, 5H), 5.40 (dt, *J* = 15.1, 6.6 Hz, 1H), 5.26 (dd, *J* = 15.1, 7.7 Hz, 1H), 3.96 (septuplet, *J* = 6.3 Hz, 1H), 2.67 (t, *J* = 7.7 Hz, 2H), 2.31 (q, *J* = 7.8 Hz, 2H), 1.97 (m, 1H), 1.32-1.18 (m, 2H), 1.15 (d, *J* = 6.0 Hz, 6H), 0.94 (d, *J* = 6.6 Hz, 3H), 0.58-0.42 (m, 2H), 0.08 (s, 6H); <sup>13</sup>C NMR (126 MHz, CDCl<sub>3</sub>)  $\delta$  142.2, 136.8, 128.5, 128.2, 127.9, 125.6, 64.7, 39.6, 36.2, 34.4, 30.5, 25.8, 20.3, 14.2, -1.6; IR (thin film, NaCl) 3028, 2969, 2924,



1454, 1367, 1249, 1173, 1127, 1028, 879, 839, 778, 698  $\text{cm}^{-1}$ ; LRMS (EI,  $\text{M}^+$ ); calcd for  $\text{C}_{19}\text{H}_{32}\text{OSi}$ , 304.22  $m/z$  ( $\text{M}^+$ ); observed, 304.3 ( $\text{M}^+$ )  $m/z$ .

**nOe's for (*E*)-isopropoxydimethyl(3-methyl-7-phenylhept-4-enyl)silane, 21:**

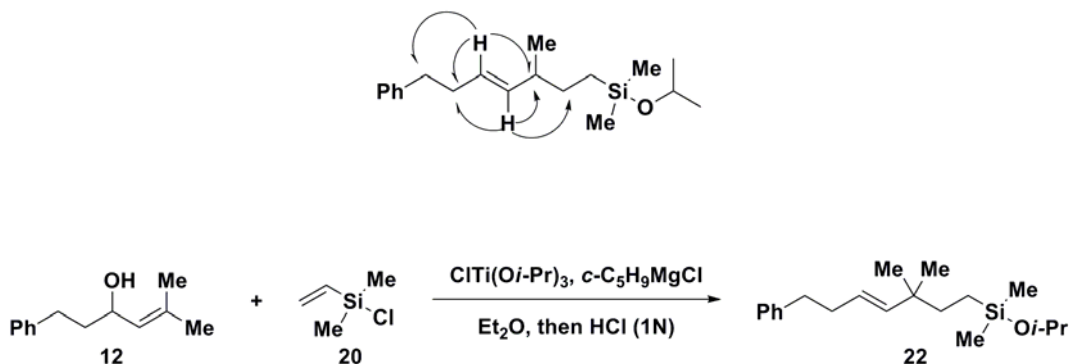

**Synthesis of (*E*)-(3,3-dimethyl-7-phenylhept-4-enyl)(isopropoxy)dimethylsilane, 22:** To a flame-dried flask equipped with a magnetic stir-bar and flushed with argon was added ether (15 mL) and chlorodimethylvinylsilane **20** (213  $\mu\text{L}$ , 1.5 mmol), then cooled to  $-78\text{ }^\circ\text{C}$ .  $\text{ClTi}(\text{O}i\text{-Pr})_3$  (1.5 mL, 1.0 M in hexanes, 1.5 mmol) and  $c\text{-C}_5\text{H}_9\text{MgCl}$  (1.5 mL, 2.0 M in diethyl ether, 3.0 mmol) were then added sequentially, and the solution was allowed to rapidly warm to  $-50\text{ }^\circ\text{C}$ . The temperature was maintained at  $-50\text{ }^\circ\text{C}$  for 2 h before cooling back to  $-78\text{ }^\circ\text{C}$  (during this time the solution turned from a bright yellow color to dark brown).

To a separate flame-dried flask equipped with a magnetic stir-bar and flushed with argon was added the allylic alcohol **12** (100 mg, 0.52 mmol) in THF (1.0 mL). The solution was cooled to  $-78\text{ }^\circ\text{C}$ , and  $n\text{-BuLi}$  (246  $\mu\text{L}$ , 2.5M in hexanes, 0.62 mmol) was added dropwise over 2 min. The solution was rapidly warmed to  $0\text{ }^\circ\text{C}$  and stirred for 15 min before being transferred via cannula to the previously prepared dark brown mixture.

The combined solution was slowly warmed to  $0\text{ }^\circ\text{C}$  over 2 h, then stirred at  $0\text{ }^\circ\text{C}$  for 30 min. To this mixture was added 1N HCl (3 mL) and stirred rapidly for 20 min at rt. This solution was filtered through a pad of silica gel to remove water and titanium salts and the

silica gel was subsequently rinsed with 150 ml of EtOAc. After concentration *in vacuo*, the NMR of the crude material was taken to determine selectivity (*E:Z*  $\geq$  20:1). The crude material was then purified by flash column chromatography on silica gel to provide product **22** (125 mg, 0.39 mmol) in 75% yield. The product was further purified by HPLC (eluting in hexanes) to furnish a sample of **22** suitable for characterization.

**Data for (*E*)-(3,3-dimethyl-7-phenylhept-4-enyl)(isopropoxy)dimethylsilane, **22**:**  $^1\text{H}$  NMR (500 MHz,  $\text{CDCl}_3$ )  $\delta$  7.30-7.14 (m, 5H), 5.33-5.30 (m, 2H), 3.96 (septuplet,  $J = 6.0$  Hz, 1H), 2.67 (t,  $J = 7.8$  Hz, 2H), 2.34-2.28 (m, 2H), 1.25-1.19 (m, 2H), 1.15 (d,  $J = 6.0$  Hz, 6H), 0.92 (s, 6H), 0.45-0.40 (m, 2H), 0.07 (s, 6H);  $^{13}\text{C}$  NMR (126 MHz,  $\text{CDCl}_3$ )  $\delta$  142.2, 140.6, 128.5, 128.2, 125.6, 125.4, 64.7, 36.4, 36.4, 36.2, 34.7, 26.7, 25.8, 10.9, -1.7; IR (thin film, NaCl) 3028, 2969, 2923, 1496, 1453, 1381, 1366, 1250, 1173, 1128, 1028, 974, 841, 698  $\text{cm}^{-1}$ ; LRMS (EI,  $\text{M}^+$ ); calcd for  $\text{C}_{20}\text{H}_{34}\text{OSi}$ , 318.24  $m/z$  ( $\text{M}^+$ ); observed, 318.1 ( $\text{M}^+$ )  $m/z$ .

**nOe's for (*E*)-(3,3-dimethyl-7-phenylhept-4-enyl)(isopropoxy)dimethylsilane, **22**:**

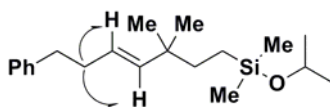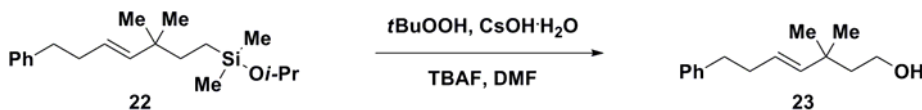

**Synthesis of (*E*)-3,3-dimethyl-7-phenylhept-4-en-1-ol, **23**:** To a cooled (0 °C) solution of *t*BuOOH (711 mL,  $\sim$ 5.5 M in decane, 3.9 mmol) in DMF (2.0 mL) was added  $\text{CsOH}\cdot\text{H}_2\text{O}$  (562 mg, 3.3 mmol). The mixture was warmed to rt, and a solution of isopropoxysilane **22** (89mg, 0.28 mmol) in DMF (0.8 mL) was added dropwise by syringe. After 10 min, TBAF

(1.4 mL, 1.0 M in THF, 1.4 mmol) was added, the mixture was heated to 70 °C, and stirred at that temperature for 4h. The mixture was cooled to rt and Na<sub>2</sub>S<sub>2</sub>O<sub>3</sub> was added. The mixture was then partitioned between water (15 mL) and ether (15 mL). The aqueous layer was extracted with ether and the combined organic layer was then washed with NaHCO<sub>3</sub> (aq., sat) and brine, before being dried over Na<sub>2</sub>SO<sub>4</sub>. After filtration and concentration *in vacuo*, the crude material was purified by flash column chromatography on silica gel (20% ethyl acetate-hexanes) to provide product **23** (54 mg, 0.25 mmol) in 88% yield. The product was further purified by HPLC (20% ethyl acetate/hexanes) to furnish a sample of **23** suitable for characterization.

**Data for (*E*)-3,3-dimethyl-7-phenylhept-4-en-1-ol, 23:** <sup>1</sup>H NMR (500 MHz, CDCl<sub>3</sub>) δ 7.30-7.14 (m, 5H), 5.44-5.33 (m, 2H), 3.56 (dt, *J* = 7.3, 5.7 Hz, 2H), 2.67 (t, *J* = 8.5, 6.3 Hz, 2H), 2.32 (dt *J* = 8.5, 6.3 Hz, 2H), 1.56 (t, *J* = 7.0 Hz, 2H), 1.17 (t, *J* = 5.4 Hz, 1H), 0.99 (s, 6H); <sup>13</sup>C NMR (126 MHz, CDCl<sub>3</sub>) δ 141.9, 140.6, 128.5, 128.2, 125.7, 125.7, 60.3, 45.5, 36.1, 34.9, 34.5, 27.7; IR (thin film, NaCl) 3350, 3026, 2958, 2928, 1453, 1362, 1024, 973, 698 cm<sup>-1</sup>; LRMS (EI, M<sup>+</sup>); calcd for C<sub>15</sub>H<sub>22</sub>O, 218.17 *m/z* (M)<sup>+</sup>; observed, 218.0 (M)<sup>+</sup> *m/z*.

**nOe's for (*E*)-3,3-dimethyl-7-phenylhept-4-en-1-ol, 23:**

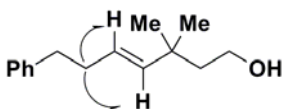

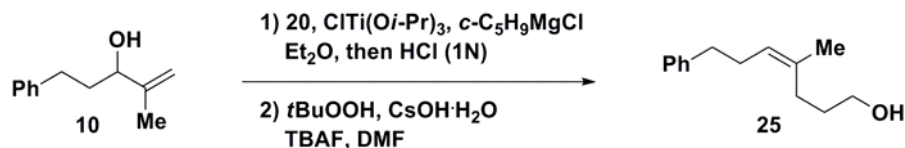

**Synthesis of (Z)-4-methyl-7-phenylhept-4-en-1-ol, 25:** To a flame-dried flask equipped with a magnetic stir-bar and flushed with argon was added ether (15 mL) and chlorodimethylvinylsilane **20** (231  $\mu\text{L}$ , 1.7 mmol), then cooled to  $-78\text{ }^\circ\text{C}$ .  $\text{ClTi}(\text{O}i\text{-Pr})_3$  (1.7 mL, 1.0 M in hexanes, 1.7 mmol) and  $c\text{-C}_5\text{H}_9\text{MgCl}$  (1.7 mL, 2.0 M in diethyl ether, 3.4 mmol) were then added sequentially, and the solution was allowed to rapidly warm to  $-50\text{ }^\circ\text{C}$ . The solution was stirred at  $-50\text{ }^\circ\text{C}$  for 2 h before cooling back to  $-78\text{ }^\circ\text{C}$  (during this time the solution turned from a bright yellow color to dark brown).

To a separate flame-dried flask equipped with a magnetic stir-bar and flushed with argon was added the allylic alcohol **10** (100 mg, 0.57 mmol) in THF (1.0 mL). The solution was cooled to  $-78\text{ }^\circ\text{C}$ , and  $n\text{-BuLi}$  (267  $\mu\text{L}$ , 2.5M in hexanes, 0.67 mmol) was added slowly dropwise over 2 min. The solution was rapidly warmed to  $0\text{ }^\circ\text{C}$  and stirred for 15 min before being transferred via cannula to the dark brown mixture. The solution was then slowly warmed to  $0\text{ }^\circ\text{C}$  over 2 h. After stirring at  $0\text{ }^\circ\text{C}$  for 30 min, 1N HCl (3 mL) was added, and the mixture was rapidly stirred for 20 min at rt. This solution was filtered through a pad of silica gel to remove water and titanium salts and the silica gel was subsequently rinsed with 150 ml of EtOAc. After concentration *in vacuo*, the crude product was used in the following reaction without purification.

To a cooled ( $0\text{ }^\circ\text{C}$ ) solution of  $t\text{BuOOH}$  (4.2 mL,  $\sim 5.5\text{ M}$  in decane, 23 mmol) in DMF (15 mL) was added  $\text{CsOH}\cdot\text{H}_2\text{O}$  (3.3 g, 20 mmol). After the mixture was warmed to rt, a solution of crude isopropoxysilane in DMF (1.0 mL) was added dropwise by syringe. After 10 min, TBAF (8.4 mL, 1.0 M in THF, 8.4 mmol) was added, the mixture was heated to  $70\text{ }^\circ\text{C}$ ,

and stirred at that temperature for 4h. The mixture was cooled to rt, and Na<sub>2</sub>S<sub>2</sub>O<sub>3</sub> was added. The mixture was then partitioned between water (45 mL) and ether (45 mL). The aqueous layer was extracted with ether (3 x 20 mL) and the combined organic layer was washed with NaHCO<sub>3</sub> (aq., sat) and brine, before being dried over Na<sub>2</sub>SO<sub>4</sub>. After filtration and concentration *in vacuo*, the crude material was purified by flash column chromatography on silica gel (20% ethyl acetate-hexanes) to provide product **25** (67 mg, 0.33 mmol) in 58% yield (2 steps). The product was further purified by HPLC (20% ethyl acetate/hexanes) to furnish a sample of **25** suitable for characterization.

**Data for (Z)-4-methyl-7-phenylhept-4-en-1-ol, 25:** <sup>1</sup>H NMR (500 MHz, CDCl<sub>3</sub>) δ 7.30-7.16 (m, 5H), 5.22 (t, *J* = 7.0 Hz, 1H), 3.60-3.54 (m, 2H), 2.64 (t, *J* = 7.8 Hz, 2H), 2.32 (app q, *J* = 7.2 Hz, 2H), 2.06 (t, *J* = 7.3 Hz, 2H), 1.70 (d, *J* = 1.3 Hz, 3H), 1.60-1.54 (m, 2H), 1.24 (br s, 1H); <sup>13</sup>C NMR (126 MHz, CDCl<sub>3</sub>) δ 142.3, 135.4, 128.5, 128.2, 125.7, 124.9, 62.8, 36.3, 30.8, 29.9, 28.0, 23.3; IR (thin film, NaCl) 3367, 2933, 1496, 1453, 1059, 698 cm<sup>-1</sup>; LRMS (EI, M<sup>+</sup>); calcd for C<sub>14</sub>H<sub>20</sub>O, 204.15 *m/z* (M)<sup>+</sup>; observed, 204.1 (M)<sup>+</sup> *m/z*.

**nOe's for (Z)-4-methyl-7-phenylhept-4-en-1-ol, 25:**

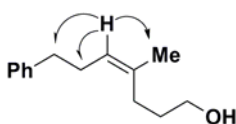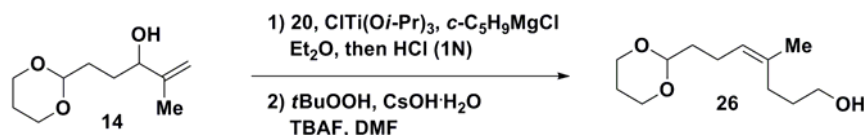

**Synthesis of (Z)-7-(1,3-dioxan-2-yl)-4-methylhept-4-en-1-ol, 26:** To a flame-dried flask equipped with a magnetic stir-bar and flushed with argon was added ether (8 mL) and

chlorodimethylvinylsilane **20** (109  $\mu\text{L}$ , 0.79 mmol), then cooled to  $-78\text{ }^\circ\text{C}$ .  $\text{ClTi}(\text{O}i\text{-Pr})_3$  (790  $\mu\text{L}$ , 1.0 M in hexanes, 0.79 mmol) and  $c\text{-C}_5\text{H}_9\text{MgCl}$  (790  $\mu\text{L}$ , 2.0 M in diethyl ether, 1.6 mmol) were then added sequentially, and the solution was allowed to rapidly warm to  $-50\text{ }^\circ\text{C}$ . The solution was stirred at  $-50\text{ }^\circ\text{C}$  for 2 h before cooling back to  $-78\text{ }^\circ\text{C}$  (during this time the solution turned from a bright yellow color to dark brown).

To a separate flame-dried flask equipped with a magnetic stir-bar and flushed with argon was added the allylic alcohol **14** (50 mg, 0.27 mmol) in THF (1.0 mL). The solution was cooled to  $-78\text{ }^\circ\text{C}$ , and  $n\text{-BuLi}$  (126  $\mu\text{L}$ , 2.5M in hexanes, 0.32 mmol) was added slowly dropwise over 2 min. The solution was rapidly warmed to  $0\text{ }^\circ\text{C}$  and stirred for 15 min before being transferred via cannula to the dark brown mixture. The solution was then slowly warmed to  $0\text{ }^\circ\text{C}$  over 2 h. After stirring at  $0\text{ }^\circ\text{C}$  for 30 min, 1N HCl (3 mL) was added, and the mixture was rapidly stirred for 20 min at rt. This solution was filtered through a pad of silica gel to remove water and titanium salts and the silica gel was subsequently rinsed with 150 ml of EtOAc. After concentration *in vacuo*, the crude product was used in the following reaction without purification.

To a cooled ( $0\text{ }^\circ\text{C}$ ) solution of  $t\text{BuOOH}$  (2.0 mL,  $\sim 5.5\text{ M}$  in decane, 11 mmol) in DMF (8 mL) was added  $\text{CsOH}\cdot\text{H}_2\text{O}$  (1.5 g, 9.5 mmol). After the mixture was warmed to rt, a solution of crude isopropoxysilane in DMF (1.0 mL) was added dropwise by syringe. After 10 min, TBAF (4.0 mL, 1.0 M in THF, 4.0 mmol) was added, the mixture was heated to  $70\text{ }^\circ\text{C}$ , and stirred at that temperature for 4h. The mixture was cooled to rt, and  $\text{Na}_2\text{S}_2\text{O}_3$  was added. The mixture was then partitioned between water (45 mL) and ether (45 mL). The aqueous layer was extracted with ether (3 x 20 mL) and the combined organic layer was washed with  $\text{NaHCO}_3$  (aq., sat) and brine, before being dried over  $\text{Na}_2\text{SO}_4$ . After filtration and

concentration *in vacuo*, the crude material was purified by flash column chromatography on silica gel (30% ethyl acetate-hexanes) to provide product **26** (29 mg, 0.14 mmol) in 51% yield (2 steps) (*Z:E*  $\geq$  20:1).

**Data for (Z)-7-(1,3-dioxan-2-yl)-4-methylhept-4-en-1-ol, 26:**  $^1\text{H}$  NMR (400 MHz,  $\text{CDCl}_3$ )  $\delta$  5.14 (t,  $J = 7.4$  Hz, 1H), 4.50 (t,  $J = 5.3$  Hz, 1H), 4.10 (dd,  $J = 10.8, 5.0$  Hz, 2H), 3.75 (td,  $J = 12.4, 2.5$  Hz, 2H), 3.61 (app q,  $J = 6.0$  Hz, 2H), 2.14-2.02 (m, 5H), 1.70-1.58 (m, 9H);  $^{13}\text{C}$  NMR (126 MHz,  $\text{CDCl}_3$ )  $\delta$  135.2, 124.9, 101.8, 66.9, 62.4, 35.4, 30.6, 27.7, 25.8, 23.3, 22.3; IR (thin film, NaCl) 3435, 2960, 2856, 1658, 1642, 1436, 1404, 1378, 1242, 1146, 1132, 1082, 1047, 997, 926, 892, 854  $\text{cm}^{-1}$ ; LRMS (EI,  $\text{M}^+$ ); calcd for  $\text{C}_{12}\text{H}_{22}\text{O}_3$ , 214.16  $m/z$  ( $\text{M}^+$ ); observed, 214.1 ( $\text{M}^+$ )  $m/z$ .

**nOe's for (Z)-7-(1,3-dioxan-2-yl)-4-methylhept-4-en-1-ol, 26:**

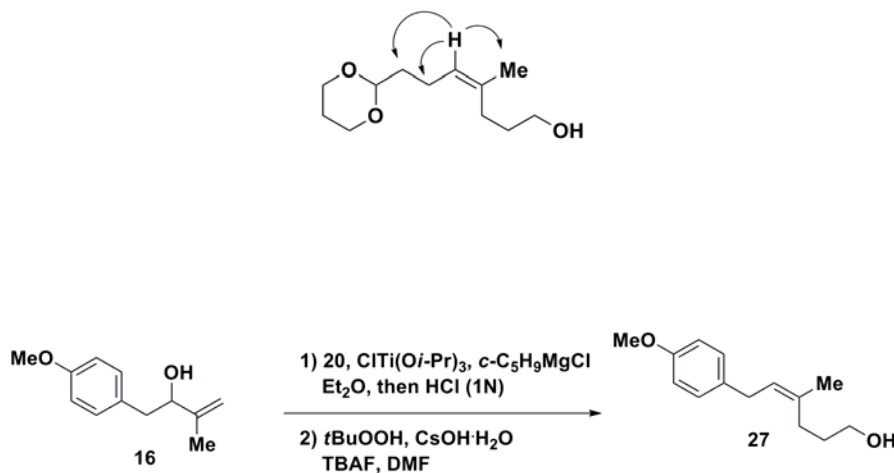

**Synthesis of (Z)-6-(4-methoxyphenyl)-4-methylhex-4-en-1-ol, 27:** To a flame-dried flask equipped with a magnetic stir-bar and flushed with argon was added ether (8 mL) and chlorodimethylvinylsilane **20** (106  $\mu\text{L}$ , 0.76 mmol), then cooled to  $-78$   $^\circ\text{C}$ .  $\text{ClTi}(\text{O}i\text{-Pr})_3$  (760  $\mu\text{L}$ , 1.0 M in hexanes, 0.76 mmol) and  $c\text{-C}_5\text{H}_9\text{MgCl}$  (760  $\mu\text{L}$ , 2.0 M in diethyl ether, 1.5 mmol) were then added sequentially, and the solution was allowed to rapidly warm to  $-50$   $^\circ\text{C}$ .

The solution was stirred at  $-50\text{ }^{\circ}\text{C}$  for 2 h before cooling back to  $-78\text{ }^{\circ}\text{C}$  (during this time the solution turned from a bright yellow color to dark brown).

To a separate flame-dried flask equipped with a magnetic stir-bar and flushed with argon was added the allylic alcohol **16** (44 mg, 0.23 mmol) in THF (1.0 mL). The solution was cooled to  $-78\text{ }^{\circ}\text{C}$ , and *n*-BuLi (122  $\mu\text{L}$ , 2.5M in hexanes, 0.30 mmol) was added slowly dropwise over 2 min. The solution was rapidly warmed to  $0\text{ }^{\circ}\text{C}$  and stirred for 15 min before being transferred via cannula to the dark brown mixture. The solution was then slowly warmed to  $0\text{ }^{\circ}\text{C}$  over 2 h. After stirring at  $0\text{ }^{\circ}\text{C}$  for 30 min, 1N HCl (3 mL) was added, and the mixture was rapidly stirred for 20 min at rt. This solution was filtered through a pad of silica gel to remove water and titanium salts and the silica gel was subsequently rinsed with 150 ml of EtOAc. After concentration *in vacuo*, the crude product was used in the following reaction without purification.

To a cooled ( $0\text{ }^{\circ}\text{C}$ ) solution of *t*BuOOH (2.0 mL,  $\sim 5.5\text{ M}$  in decane, 11 mmol) in DMF (8 mL) was added CsOH $\cdot$ H<sub>2</sub>O (1.5 g, 9.5 mmol). After the mixture was warmed to rt, a solution of crude isopropoxysilane in DMF (1.0 mL) was added dropwise by syringe. After 10 min, TBAF (4.0 mL, 1.0 M in THF, 4.0 mmol) was added, the mixture was heated to  $70\text{ }^{\circ}\text{C}$ , and stirred at that temperature for 4h. The mixture was cooled to rt, and Na<sub>2</sub>S<sub>2</sub>O<sub>3</sub> was added. The mixture was then partitioned between water (45 mL) and ether (45 mL). The aqueous layer was extracted with ether (3 x 20 mL) and the combined organic layer was washed with NaHCO<sub>3</sub> (aq., sat) and brine, before being dried over Na<sub>2</sub>SO<sub>4</sub>. After filtration and concentration *in vacuo*, the crude material was purified by flash column chromatography on silica gel (20% ethyl acetate-hexanes) to provide product **27** (29 mg, 0.13 mmol) in 58% yield (2 steps) (*Z*:*E*  $\geq 20$ :1). Product **27** decomposes slowly upon exposure to air to an inseparable



product hypothesized to come from benzylic oxidation followed by allylic transposition. Therefore, product **27** is characterized with this as a small impurity.

**Data for (Z)-6-(4-methoxyphenyl)-4-methylhex-4-en-1-ol, 27:**  $^1\text{H}$  NMR (500 MHz,  $\text{CDCl}_3$ )  $\delta$  7.09 (d,  $J = 8.2$  Hz, 2H), 6.82 (d,  $J = 8.2$  Hz, 2H), 5.35 (t,  $J = 7.5$  Hz, 1H), 3.78 (s, 3H), 3.65 (br t,  $J = 5.6$  Hz, 2H), 3.31 (d,  $J = 7.2$  Hz, 2H), 2.21 (t,  $J = 7.2$  Hz, 2H), 1.75 (s, 3H), 1.73-1.67 (m, 2H);  $^{13}\text{C}$  NMR (126 MHz,  $\text{CDCl}_3$ )  $\delta$  157.7, 135.5, 133.7, 129.1, 124.6, 113.8, 62.8, 55.2, 33.0, 30.8, 28.0, 23.3; IR (thin film, NaCl) 3425, 1658, 1641, 1632, 1540, 1512, 1362, 1246, 1175, 1035  $\text{cm}^{-1}$ ; LRMS (EI,  $\text{M}^+$ ); calcd for  $\text{C}_{14}\text{H}_{20}\text{O}_2$ , 220.15  $m/z$  ( $\text{M}^+$ ); observed, 220.1 ( $\text{M}^+$ )  $m/z$ .

**nOe's for (Z)-6-(4-methoxyphenyl)-4-methylhex-4-en-1-ol, 27:**

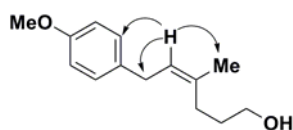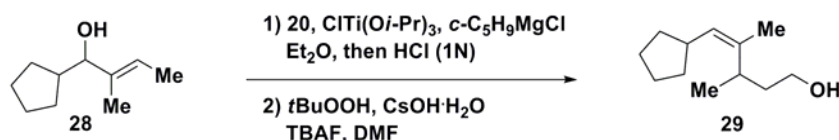

**Synthesis of (Z)-5-cyclopentyl-3,4-dimethylpent-4-en-1-ol, 29:** To a flame-dried flask equipped with a magnetic stir-bar and flushed with argon was added ether (9.5 mL) and chlorodimethylvinylsilane **20** (132  $\mu\text{L}$ , 0.95 mmol), then cooled to  $-78$   $^\circ\text{C}$ .  $\text{CITi}(\text{O}i\text{-Pr})_3$  (950  $\mu\text{L}$ , 1.0 M in hexanes, 0.95 mmol) and  $c\text{-C}_5\text{H}_9\text{MgCl}$  (950  $\mu\text{L}$ , 2.0 M in diethyl ether, 1.9 mmol) were then added sequentially, and the solution was allowed to rapidly warm to  $-50$   $^\circ\text{C}$ . The solution was stirred at  $-50$   $^\circ\text{C}$  for 2 h before cooling back to  $-78$   $^\circ\text{C}$  (during this time the solution turned from a bright yellow color to dark brown).

To a separate flame-dried flask equipped with a magnetic stir-bar and flushed with argon was added the allylic alcohol **28** (50 mg, 0.32 mmol) in THF (1.0 mL). The solution was cooled to  $-78\text{ }^{\circ}\text{C}$ , and *n*-BuLi (152  $\mu\text{L}$ , 2.5M in hexanes, 0.38 mmol) was added slowly dropwise over 2 min. The solution was rapidly warmed to  $0\text{ }^{\circ}\text{C}$  and stirred for 15 min before being transferred via cannula to the dark brown mixture. The solution was then slowly warmed to  $0\text{ }^{\circ}\text{C}$  over 2 h. After stirring at  $0\text{ }^{\circ}\text{C}$  for 30 min, 1N HCl (3 mL) was added, and the mixture was rapidly stirred for 20 min at rt. This solution was filtered through a pad of silica gel to remove water and titanium salts and the silica gel was subsequently rinsed with 150 ml of EtOAc. After concentration *in vacuo*, the crude product was used in the following reaction without purification.

To a cooled ( $0\text{ }^{\circ}\text{C}$ ) solution of *t*BuOOH (2.4 mL,  $\sim 5.5\text{ M}$  in decane, 13 mmol) in DMF (9 mL) was added CsOH $\cdot$ H<sub>2</sub>O (1.9 g, 9.5 mmol). After the mixture was warmed to rt, a solution of crude isopropoxysilane in DMF (1.0 mL) was added dropwise by syringe. After 10 min, TBAF (4.7 mL, 1.0 M in THF, 4.7 mmol) was added, the mixture was heated to  $70\text{ }^{\circ}\text{C}$ , and stirred at that temperature for 4h. The mixture was cooled to rt, and Na<sub>2</sub>S<sub>2</sub>O<sub>3</sub> was added. The mixture was then partitioned between water (45 mL) and ether (45 mL). The aqueous layer was extracted with ether (3 x 20 mL) and the combined organic layer was washed with NaHCO<sub>3</sub> (aq., sat) and brine, before being dried over Na<sub>2</sub>SO<sub>4</sub>. After filtration and concentration *in vacuo*, the crude material was purified by flash column chromatography on silica gel (15% ethyl acetate-hexanes) to provide product **29** (40 mg, 0.22 mmol) in 69% yield (2 steps) (*Z:E*  $\geq$  20:1).

**Data for (Z)-5-cyclopentyl-3,4-dimethylpent-4-en-1-ol, 29:** <sup>1</sup>H NMR (500 MHz, CDCl<sub>3</sub>)  $\delta$  5.07 (dd, *J* = 9.5, 1.3 Hz, 1H), 3.64-3.53 (m, 2H), 2.88-2.80 (m, 1H), 2.72-2.63 (m, 1H),

1.78-1.50 (m, 8H), 1.58 (d,  $J = 1.3$  Hz, 3H), 1.36 (t,  $J = 5.7$  Hz, 1H), 1.22-1.12 (m, 2H), 0.99 (d,  $J = 6.9$  Hz, 3H);  $^{13}\text{C}$  NMR (126 MHz,  $\text{CDCl}_3$ )  $\delta$  137.2, 131.7, 62.0, 38.2, 37.4, 34.2, 34.0, 31.3, 25.3, 19.7, 17.9; IR (thin film, NaCl) 3354, 2956, 2869, 1451, 1374, 1047, 995, 848  $\text{cm}^{-1}$ ; LRMS (EI,  $\text{M}^+$ ); calcd for  $\text{C}_{12}\text{H}_{22}\text{O}$ , 182.17  $m/z$  ( $\text{M}^+$ ); observed, 182.1 ( $\text{M}^+$ )  $m/z$ .

**nOe's for (Z)-5-cyclopentyl-3,4-dimethylpent-4-en-1-ol, 29:**

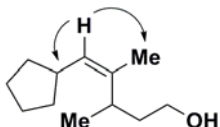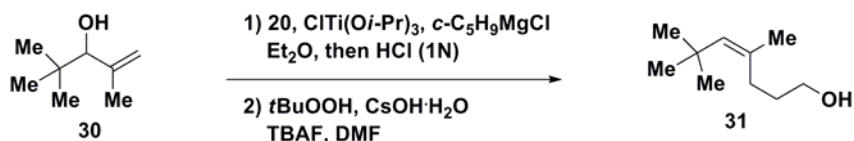

**Synthesis of (Z)-4,6,6-trimethylhept-4-en-1-ol, 31:** To a flame-dried flask equipped with a magnetic stir-bar and flushed with argon was added ether (11 mL) and chlorodimethylvinylsilane **20** (158  $\mu\text{L}$ , 1.1 mmol), then cooled to  $-78$   $^{\circ}\text{C}$ .  $\text{ClTi}(\text{O}i\text{-Pr})_3$  (1.1 mL, 1.0 M in hexanes, 1.1 mmol) and  $c\text{-C}_5\text{H}_9\text{MgCl}$  (1.1 mL, 2.0 M in diethyl ether, 2.2 mmol) were then added sequentially, and the solution was allowed to rapidly warm to  $-50$   $^{\circ}\text{C}$ . The solution was stirred at  $-50$   $^{\circ}\text{C}$  for 2 h before cooling back to  $-78$   $^{\circ}\text{C}$  (during this time the solution turned from a bright yellow color to dark brown).

To a separate flame-dried flask equipped with a magnetic stir-bar and flushed with argon was added the allylic alcohol **30** (50 mg, 0.39 mmol) in THF (1.0 mL). The solution was cooled to  $-78$   $^{\circ}\text{C}$ , and  $n\text{-BuLi}$  (184  $\mu\text{L}$ , 2.5M in hexanes, 0.46 mmol) was added slowly dropwise over 2 min. The solution was rapidly warmed to  $0$   $^{\circ}\text{C}$  and stirred for 15 min before

being transferred via cannula to the dark brown mixture. The solution was then slowly warmed to 0 °C over 2 h. After stirring at 0 °C for 30 min, 1N HCl (3 mL) was added, and the mixture was rapidly stirred for 20 min at rt. This solution was filtered through a pad of silica gel to remove water and titanium salts and the silica gel was subsequently rinsed with 150 ml of EtOAc. After concentration *in vacuo*, the crude product was used in the following reaction without purification.

To a cooled (0 °C) solution of *t*BuOOH (2.5 mL, ~5.5 M in decane, 14 mmol) in DMF (10 mL) was added CsOH•H<sub>2</sub>O (2.3 g, 13 mmol). After the mixture was warmed to rt, a solution of crude isopropoxysilane in DMF (1.0 mL) was added dropwise by syringe. After 10 min, TBAF (5.7 mL, 1.0 M in THF, 5.7 mmol) was added, the mixture was heated to 70 °C, and stirred at that temperature for 4h. The mixture was cooled to rt, and Na<sub>2</sub>S<sub>2</sub>O<sub>3</sub> was added. The mixture was then partitioned between water (45 mL) and ether (45 mL). The aqueous layer was extracted with ether (3 x 20 mL) and the combined organic layer was washed with NaHCO<sub>3</sub> (aq., sat) and brine, before being dried over Na<sub>2</sub>SO<sub>4</sub>. After filtration and concentration *in vacuo*, the crude material was purified by flash column chromatography on silica gel (15% ethyl acetate-hexanes) to provide product **31** (31 mg, 0.22 mmol) in 56% yield (2 steps) (*Z*:*E* ≥ 20:1).

**Data for (Z)-4,6,6-trimethylhept-4-en-1-ol, 31:** <sup>1</sup>H NMR (500 MHz, CDCl<sub>3</sub>) δ 5.19 (s, 1H), 3.69-3.64 (m, 2H), 2.23-2.18 (m, 2H), 1.72-1.66 (m, 2H), 1.67 (d, *J* = 1.6 Hz, 3H), 1.39 (t, *J* = 5.3 Hz, 1H), 1.09 (s, 9H); <sup>13</sup>C NMR (126 MHz, CDCl<sub>3</sub>) δ 136.0, 133.9, 63.3, 32.2, 31.5, 31.4, 28.8, 24.9; IR (thin film, NaCl) 3355, 2957, 1709, 1656, 1463, 1395, 1362, 1200, 1175, 1065, 907, 831, 735, 590 cm<sup>-1</sup>; LRMS (EI, M<sup>+</sup>); calcd for C<sub>10</sub>H<sub>20</sub>O, 156.15 *m/z* (M)<sup>+</sup>; observed, 156.1 (M)<sup>+</sup> *m/z*.

**nOe's for (Z)-4,6,6-trimethylhept-4-en-1-ol, 31:**

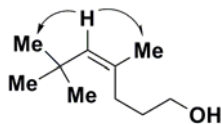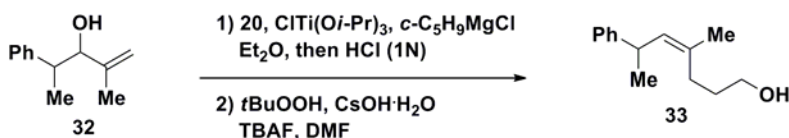

**Synthesis of (Z)-4-methyl-6-phenylhept-4-en-1-ol, 33:** To a flame-dried flask equipped with a magnetic stir-bar and flushed with argon was added ether (8 mL) and chlorodimethylvinylsilane **20** (115  $\mu\text{L}$ , 0.8 mmol), then cooled to  $-78\text{ }^\circ\text{C}$ .  $\text{CITi}(\text{O}i\text{-Pr})_3$  (830  $\mu\text{L}$ , 1.0 M in hexanes, 0.8 mmol) and  $c\text{-C}_5\text{H}_9\text{MgCl}$  (830  $\mu\text{L}$ , 2.0 M in diethyl ether, 1.6 mmol) were then added sequentially, and the solution was allowed to rapidly warm to  $-50\text{ }^\circ\text{C}$ . The solution was stirred at  $-50\text{ }^\circ\text{C}$  for 2 h before cooling back to  $-78\text{ }^\circ\text{C}$  (during this time the solution turned from a bright yellow color to dark brown).

To a separate flame-dried flask equipped with a magnetic stir-bar and flushed with argon was added the allylic alcohol **32** (4:1 mixture of diastereomers, 50 mg, 0.28 mmol) in THF (1.0 mL). The solution was cooled to  $-78\text{ }^\circ\text{C}$ , and  $n\text{-BuLi}$  (132  $\mu\text{L}$ , 2.5M in hexanes, 0.33 mmol) was added slowly dropwise over 2 min. The solution was rapidly warmed to  $0\text{ }^\circ\text{C}$  and stirred for 15 min before being transferred via cannula to the dark brown mixture. The solution was then slowly warmed to  $0\text{ }^\circ\text{C}$  over 2 h. After stirring at  $0\text{ }^\circ\text{C}$  for 30 min, 1N HCl (3 mL) was added, and the mixture was rapidly stirred for 20 min at rt. This solution was filtered through a pad of silica gel to remove water and titanium salts and the silica gel was

subsequently rinsed with 150 ml of EtOAc. After concentration *in vacuo*, the crude product was used in the following reaction without purification.

To a cooled (0 °C) solution of *t*BuOOH (2.0 mL, ~5.5 M in decane, 11 mmol) in DMF (8 mL) was added CsOH•H<sub>2</sub>O (1.7 g, 10 mmol). After the mixture was warmed to rt, a solution of crude isopropoxysilane in DMF (1.0 mL) was added dropwise by syringe. After 10 min, TBAF (4.1 mL, 1.0 M in THF, 4.1 mmol) was added, and the mixture was warmed to 70 °C and stirred at that temperature for 4h. The mixture was cooled to rt, and Na<sub>2</sub>S<sub>2</sub>O<sub>3</sub> was added. The mixture was then partitioned between water (45 mL) and ether (45 mL). The aqueous layer was extracted with ether (3 x 20 mL) and the combined organic layer was washed with NaHCO<sub>3</sub> (aq., sat) and brine, before being dried over Na<sub>2</sub>SO<sub>4</sub>. After filtration and concentration *in vacuo*, the crude material was purified by flash column chromatography on silica gel (25% ethyl acetate-hexanes) to provide product **33** (37 mg, 0.18 mmol) in 64% yield (2 steps) (*Z*:*E* ≥ 20:1).

**Data for (Z)-4-methyl-6-phenylhept-4-en-1-ol, 33:** <sup>1</sup>H NMR (500 MHz, CDCl<sub>3</sub>) δ 7.31-7.15 (m, 5H), 5.34 (d, *J* = 9.1 Hz, 1H), 3.74-3.66 (m, 1H), 3.58 (app q, *J* = 6.3 Hz, 2H), 2.18 (t, *J* = 7.7 Hz, 2H), 1.71 (d, *J* = 1.5 Hz, 3H), 1.70-1.57 (m, 2H), 1.31 (d, *J* = 6.8 Hz, 3H); <sup>13</sup>C NMR (100 MHz, CDCl<sub>3</sub>) δ 147.3, 133.7, 131.2, 128.4, 126.8, 125.8, 62.7, 37.8, 30.8, 28.2, 23.3, 22.9; IR (thin film, NaCl) 3328, 3025, 2960, 2867, 1652, 1493, 1450, 1375, 1046, 1015, 759, 698 cm<sup>-1</sup>; LRMS (EI, M<sup>+</sup>); calcd for C<sub>14</sub>H<sub>20</sub>O, 204.15 *m/z* (M)<sup>+</sup>; observed, 204.2 (M)<sup>+</sup> *m/z*.

**nOe's for (Z)-4-methyl-6-phenylhept-4-en-1-ol, 33:**

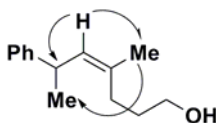

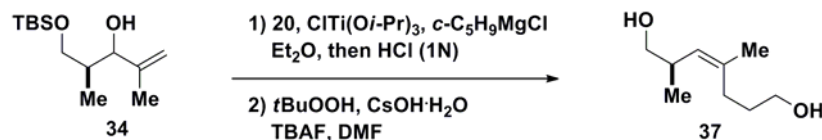

**Synthesis of (*R,Z*)-2,4-dimethylhept-3-ene-1,7-diol, **37**:** To a flame-dried flask equipped with a magnetic stir-bar and flushed with argon was added ether (6 mL) and chlorodimethylvinylsilane **20** (83  $\mu$ L, 0.6 mmol), then cooled to  $-78$   $^{\circ}$ C. ClTi(Oi-Pr)<sub>3</sub> (600  $\mu$ L, 1.0 M in hexanes, 0.6 mmol) and *c*-C<sub>5</sub>H<sub>9</sub>MgCl (600  $\mu$ L, 2.0 M in diethyl ether, 1.2 mmol) were then added sequentially, and the solution was allowed to rapidly warm to  $-50$   $^{\circ}$ C. The solution was stirred at  $-50$   $^{\circ}$ C for 2 h before cooling back to  $-78$   $^{\circ}$ C (during this time the solution turned from a bright yellow color to dark brown).

To a separate flame-dried flask equipped with a magnetic stir-bar and flushed with argon was added the allylic alcohol **34** (1.5:1 mixture of diastereomers, 50 mg, 0.20 mmol) in THF (1.0 mL). The solution was cooled to  $-78$   $^{\circ}$ C, and *n*-BuLi (96  $\mu$ L, 2.5M in hexanes, 0.24 mmol) was added slowly dropwise over 2 min. The solution was rapidly warmed to 0  $^{\circ}$ C and stirred for 15 min before being transferred via cannula to the dark brown mixture. The solution was then slowly warmed to 0  $^{\circ}$ C over 2 h. After stirring at 0  $^{\circ}$ C for 30 min, 1N HCl (3 mL) was added, and the mixture was rapidly stirred for 20 min at rt. This solution was filtered through a pad of silica gel to remove water and titanium salts and the silica gel was subsequently rinsed with 150 ml of EtOAc. After concentration *in vacuo*, the crude product was used in the following reaction without purification.

To a cooled (0  $^{\circ}$ C) solution of *t*BuOOH (1.7 mL,  $\sim$ 5.5 M in decane, 9.5 mmol) in DMF (7 mL) was added CsOH·H<sub>2</sub>O (1.4 g, 8.2 mmol). After the mixture was warmed to rt, a solution of crude isopropoxysilane in DMF (1.0 mL) was added dropwise by syringe. After 10 min, TBAF (3.4 mL, 1.0 M in THF, 3.4 mmol) was added, and the mixture was warmed to 70

°C and stirred at that temperature for 4h. The mixture was cooled to rt, and Na<sub>2</sub>S<sub>2</sub>O<sub>3</sub> was added. The mixture was then partitioned between water (45 mL) and ether (45 mL). The aqueous layer was extracted with ether (3 x 20 mL) and the combined organic layer was washed with NaHCO<sub>3</sub> (aq., sat) and brine, before being dried over Na<sub>2</sub>SO<sub>4</sub>. After filtration and concentration *in vacuo*, the crude material was purified by flash column chromatography on silica gel (60% ethyl acetate-hexanes) to provide product **37** (21 mg, 0.13 mmol) in 66% yield (2 steps) (*Z:E* ≥ 20:1).

**Data for (*R,Z*)-2,4-dimethylhept-3-ene-1,7-diol, **37**:** [ $\alpha$ ]<sub>589</sub><sup>20</sup> +21.6 ° (*c* = 0.36, CHCl<sub>3</sub>); <sup>1</sup>H NMR (500 MHz, CDCl<sub>3</sub>)  $\delta$  4.94 (d, *J* = 9.8 Hz, 1H), 3.62 (t, *J* = 5.9 Hz, 2H), 3.51 (dd, *J* = 10.4, 5.4 Hz, 1H), 3.30 (dd, *J* = 10.0, 8.8 Hz, 1H), 2.73-2.64 (m, 1H), 2.29 (ddd, *J* = 13.6, 8.2, 8.2 Hz, 1H), 2.09 (ddd, *J* = 13.6, 6.6, 6.6 Hz, 1H), 2.00-1.50 (br s, 2H), 1.73 (d, *J* = 1.6 Hz, 3H), 1.70-1.64 (m, 2H), 0.90 (d, *J* = 6.6 Hz, 3H); <sup>13</sup>C NMR (126 MHz, CDCl<sub>3</sub>)  $\delta$  136.8, 128.9, 68.0, 61.9, 35.1, 30.4, 28.0, 23.3, 17.3; IR (thin film, NaCl) 3348, 2931, 2869, 1722, 1452, 1377, 1275, 1035, 846 cm<sup>-1</sup>; LRMS (EI, M<sup>+</sup>); calcd for C<sub>9</sub>H<sub>18</sub>O<sub>2</sub>, 158.13 *m/z* (M)<sup>+</sup>; observed, 158.2 (M)<sup>+</sup> *m/z*.

**nOe's for (*R,Z*)-2,4-dimethylhept-3-ene-1,7-diol, **37**:**

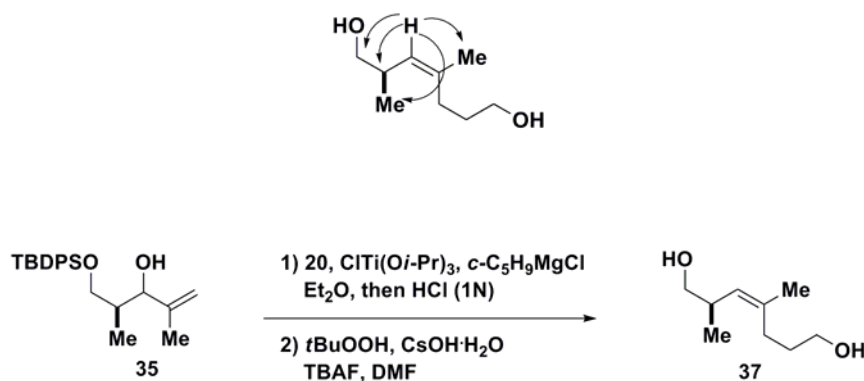

**Synthesis of (*R,Z*)-2,4-dimethylhept-3-ene-1,7-diol, **37**:** To a flame-dried flask equipped with a magnetic stir-bar and flushed with argon was added ether (6 mL) and



chlorodimethylvinylsilane **20** (55  $\mu\text{L}$ , 0.4 mmol), then cooled to  $-78\text{ }^\circ\text{C}$ .  $\text{ClTi}(\text{O}i\text{-Pr})_3$  (400  $\mu\text{L}$ , 1.0 M in hexanes, 0.4 mmol) and  $c\text{-C}_5\text{H}_9\text{MgCl}$  (400  $\mu\text{L}$ , 2.0 M in diethyl ether, 0.8 mmol) were then added sequentially, and the solution was allowed to rapidly warm to  $-50\text{ }^\circ\text{C}$ . The solution was stirred at  $-50\text{ }^\circ\text{C}$  for 2 h before cooling back to  $-78\text{ }^\circ\text{C}$  (during this time the solution turned from a bright yellow color to dark brown).

To a separate flame-dried flask equipped with a magnetic stir-bar and flushed with argon was added the allylic alcohol **35** (1.2:1 mixture of diastereomers, 50 mg, 0.13 mmol) in THF (1.0 mL). The solution was cooled to  $-78\text{ }^\circ\text{C}$ , and  $n\text{-BuLi}$  (64  $\mu\text{L}$ , 2.5M in hexanes, 0.15 mmol) was added slowly dropwise over 2 min. The solution was rapidly warmed to  $0\text{ }^\circ\text{C}$  and stirred for 15 min before being transferred via cannula to the dark brown mixture. The solution was then slowly warmed to  $0\text{ }^\circ\text{C}$  over 2 h. After stirring at  $0\text{ }^\circ\text{C}$  for 30 min, 1N HCl (3 mL) was added, and the mixture was rapidly stirred for 20 min at rt. This solution was filtered through a pad of silica gel to remove water and titanium salts and the silica gel was subsequently rinsed with 150 ml of EtOAc. After concentration *in vacuo*, the crude product was used in the following reaction without purification.

To a cooled ( $0\text{ }^\circ\text{C}$ ) solution of  $t\text{BuOOH}$  (1.0 mL,  $\sim 5.5\text{ M}$  in decane, 5.6 mmol) in DMF (7 mL) was added  $\text{CsOH}\cdot\text{H}_2\text{O}$  (800 mg, 4.8 mmol). After the mixture was warmed to rt, a solution of crude isopropoxysilane in DMF (1.0 mL) was added dropwise by syringe. After 10 min, TBAF (2.0 mL, 1.0 M in THF, 2.0 mmol) was added, and the mixture was warmed to  $70\text{ }^\circ\text{C}$  and stirred at that temperature for 4h. The mixture was cooled to rt, and  $\text{Na}_2\text{S}_2\text{O}_3$  was added. The mixture was then partitioned between water (45 mL) and ether (45 mL). The aqueous layer was extracted with ether (3 x 20 mL) and the combined organic layer was washed with  $\text{NaHCO}_3$  (aq., sat) and brine, before being dried over  $\text{Na}_2\text{SO}_4$ . After filtration

and concentration *in vacuo*, the crude material was purified by flash column chromatography on silica gel (60% ethyl acetate-hexanes) to provide product **37** (12 mg, 0.08 mmol) in 61% yield (2 steps) (*Z:E* ≥ 20:1).

**Data for (R,Z)-2,4-dimethylhept-3-ene-1,7-diol, 37:**  $[\alpha]_{589}^{20} +21.6^\circ$  ( $c = 0.36$ ,  $\text{CHCl}_3$ );  $^1\text{H}$  NMR (500 MHz,  $\text{CDCl}_3$ )  $\delta$  4.94 (d,  $J = 9.8$  Hz, 1H), 3.62 (t,  $J = 5.9$  Hz, 2H), 3.51 (dd,  $J = 10.4, 5.4$  Hz, 1H), 3.30 (dd,  $J = 10.0, 8.8$  Hz, 1H), 2.73-2.64 (m, 1H), 2.29 (ddd,  $J = 13.6, 8.2, 8.2$  Hz, 1H), 2.09 (ddd,  $J = 13.6, 6.6, 6.6$  Hz, 1H), 2.00-1.50 (br s, 2H), 1.73 (d,  $J = 1.6$  Hz, 3H), 1.70-1.64 (m, 2H), 0.90 (d,  $J = 6.6$  Hz, 3H);  $^{13}\text{C}$  NMR (126 MHz,  $\text{CDCl}_3$ )  $\delta$  136.8, 128.9, 68.0, 61.9, 35.1, 30.4, 28.0, 23.3, 17.3; IR (thin film, NaCl) 3348, 2931, 2869, 1722, 1452, 1377, 1275, 1035, 846  $\text{cm}^{-1}$ ; LRMS (EI,  $\text{M}^+$ ); LRMS (EI,  $\text{M}^+$ ); calcd for  $\text{C}_9\text{H}_{18}\text{O}_2$ , 158.13  $m/z$  ( $\text{M}^+$ ); observed, 158.2 ( $\text{M}^+$ )  $m/z$ .

**nOe's for (R,Z)-2,4-dimethylhept-3-ene-1,7-diol, 37:**

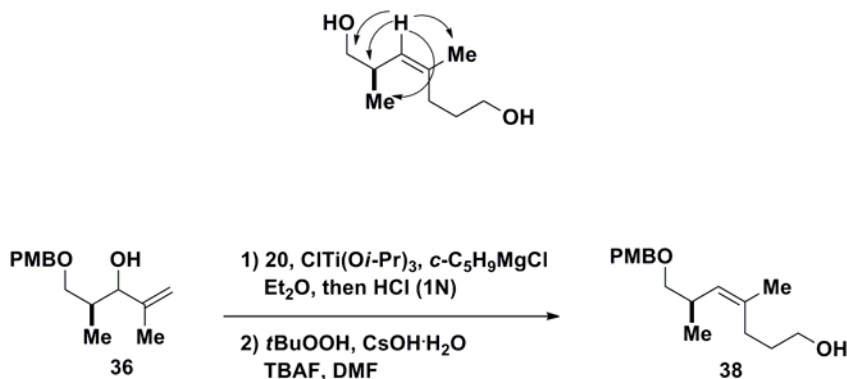

**Synthesis of (R,Z)-7-(4-methoxybenzyloxy)-4,6-dimethylhept-4-en-1-ol, 38:** To a flame-dried flask equipped with a magnetic stir-bar and flushed with argon was added ether (6 mL) and chlorodimethylvinylsilane **20** (81  $\mu\text{L}$ , 0.59 mmol), then cooled to  $-78^\circ\text{C}$ .  $\text{ClTi}(\text{O}i\text{-Pr})_3$  (590  $\mu\text{L}$ , 1.0 M in hexanes, 0.59 mmol) and  $c\text{-C}_5\text{H}_9\text{MgCl}$  (590  $\mu\text{L}$ , 2.0 M in diethyl ether, 1.2 mmol) were then added sequentially, and the solution was allowed to rapidly warm to  $-50^\circ\text{C}$ .

The solution was stirred at  $-50\text{ }^{\circ}\text{C}$  for 2 h before cooling back to  $-78\text{ }^{\circ}\text{C}$  (during this time the solution turned from a bright yellow color to dark brown).

To a separate flame-dried flask equipped with a magnetic stir-bar and flushed with argon was added the allylic alcohol **36** (1.5:1 mixture of diastereomers, 50 mg, 0.20 mmol) in THF (1.0 mL). The solution was cooled to  $-78\text{ }^{\circ}\text{C}$ , and *n*-BuLi (94  $\mu\text{L}$ , 2.5M in hexanes, 0.23 mmol) was added slowly dropwise over 2 min. The solution was rapidly warmed to  $0\text{ }^{\circ}\text{C}$  and stirred for 15 min before being transferred via cannula to the dark brown mixture. The solution was then slowly warmed to  $0\text{ }^{\circ}\text{C}$  over 2 h. After stirring at  $0\text{ }^{\circ}\text{C}$  for 30 min, 1N HCl (3 mL) was added, and the mixture was rapidly stirred for 20 min at rt. This solution was filtered through a pad of silica gel to remove water and titanium salts and the silica gel was subsequently rinsed with 150 ml of EtOAc. After concentration *in vacuo*, the crude product was used in the following reaction without purification.

To a cooled ( $0\text{ }^{\circ}\text{C}$ ) solution of *t*BuOOH (1.5 mL,  $\sim 5.5\text{ M}$  in decane, 8.2 mmol) in DMF (6 mL) was added CsOH $\cdot$ H<sub>2</sub>O (1.2 g, 7.0 mmol). After the mixture was warmed to rt, a solution of crude isopropoxysilane in DMF (1.0 mL) was added dropwise by syringe. After 10 min, TBAF (2.9 mL, 1.0 M in THF, 2.9 mmol) was added, and the mixture was warmed to  $70\text{ }^{\circ}\text{C}$  and stirred at that temperature for 4h. The mixture was cooled to rt, and Na<sub>2</sub>S<sub>2</sub>O<sub>3</sub> was added. The mixture was then partitioned between water (45 mL) and ether (45 mL). The aqueous layer was extracted with ether (3 x 20 mL) and the combined organic layer was washed with NaHCO<sub>3</sub> (aq., sat) and brine, before being dried over Na<sub>2</sub>SO<sub>4</sub>. After filtration and concentration *in vacuo*, the crude material was purified by flash column chromatography on silica gel (25% ethyl acetate-hexanes) to provide product **38** (34 mg, 0.12 mmol) in 61% yield (2 steps) as a 1.2:1 mixture of olefin isomers.
