# Supplementary material
Source: PubMed Central journal article supplement (PMC2732435)
Supplement: NIHMS91435-supplement-2_si_002.pdf [file NIHMS91435-supplement-2_si_002.pdf]

**Conversion of Allylic Alcohols to Stereodefined  
Trisubstituted Alkenes: A Complementary Process to the  
Claisen Rearrangement**

Justin K. Belardi and Glenn C. Micalizio

**SUPPORTING INFORMATION-2:**

**Spectral Data for Compounds 7, 9, 11, 13, 15, 17, 19, *epi*-19, 21, 22, 23, 25-27, 29, 31, 33, and 37**

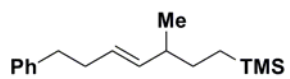

7

Characterized as a 9:1 mixture of olefin isomers

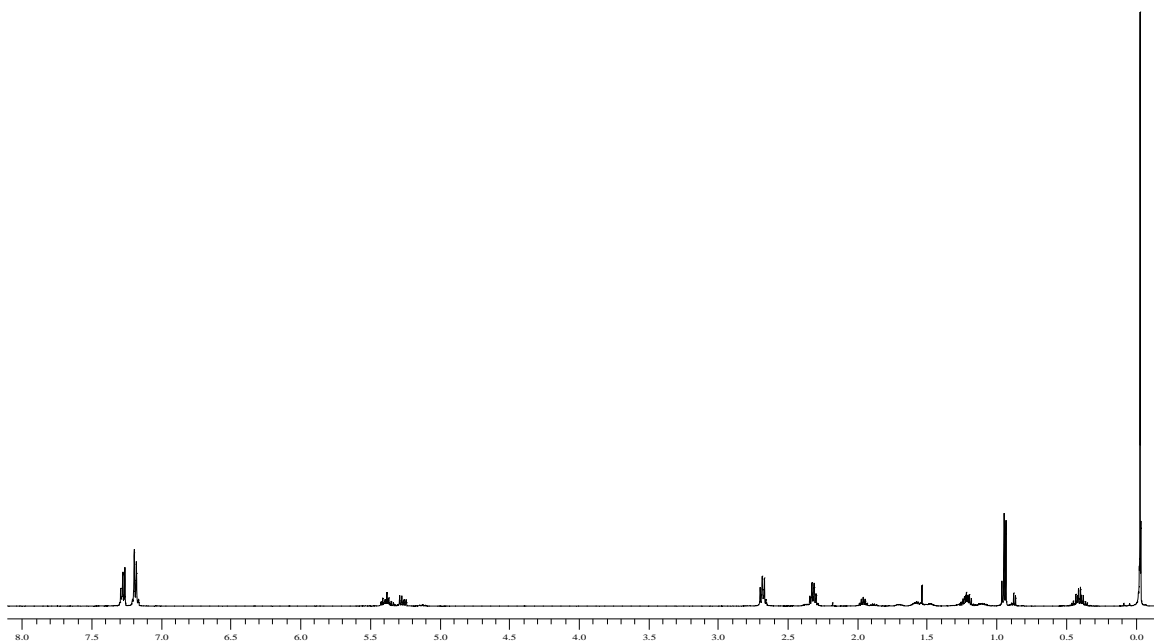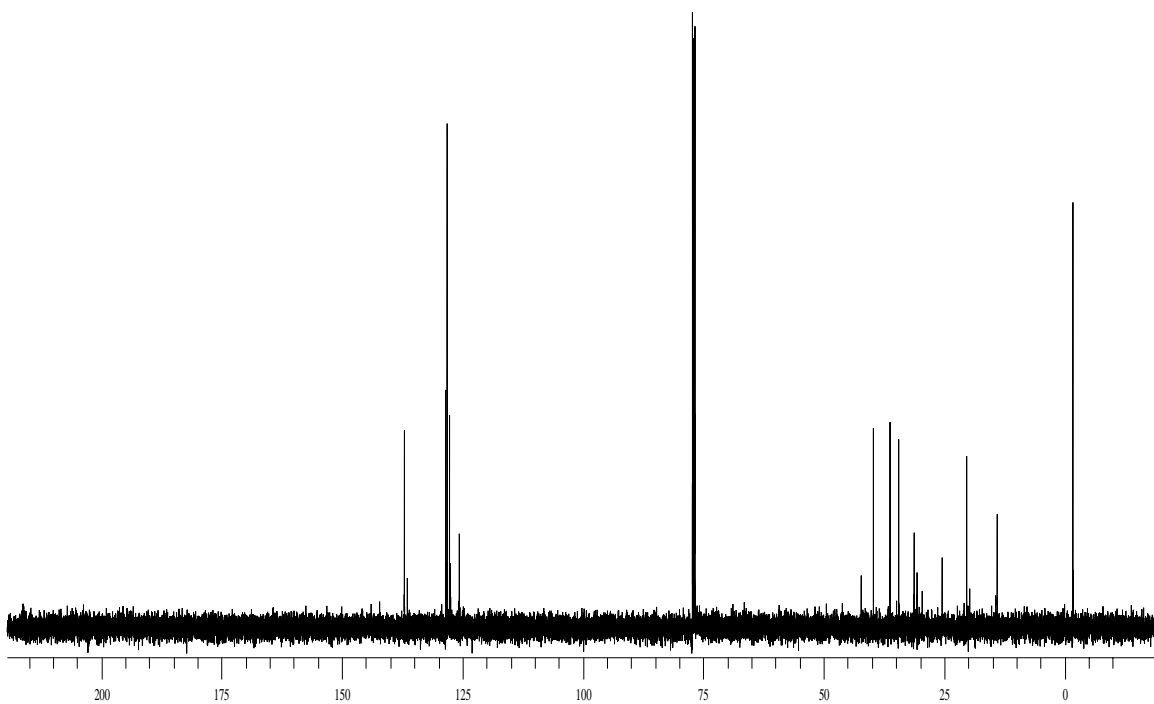

<sup>1</sup>H (500 MHz) and <sup>13</sup>C (126 MHz) of compound 7 (CDCl<sub>3</sub>)

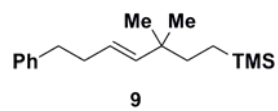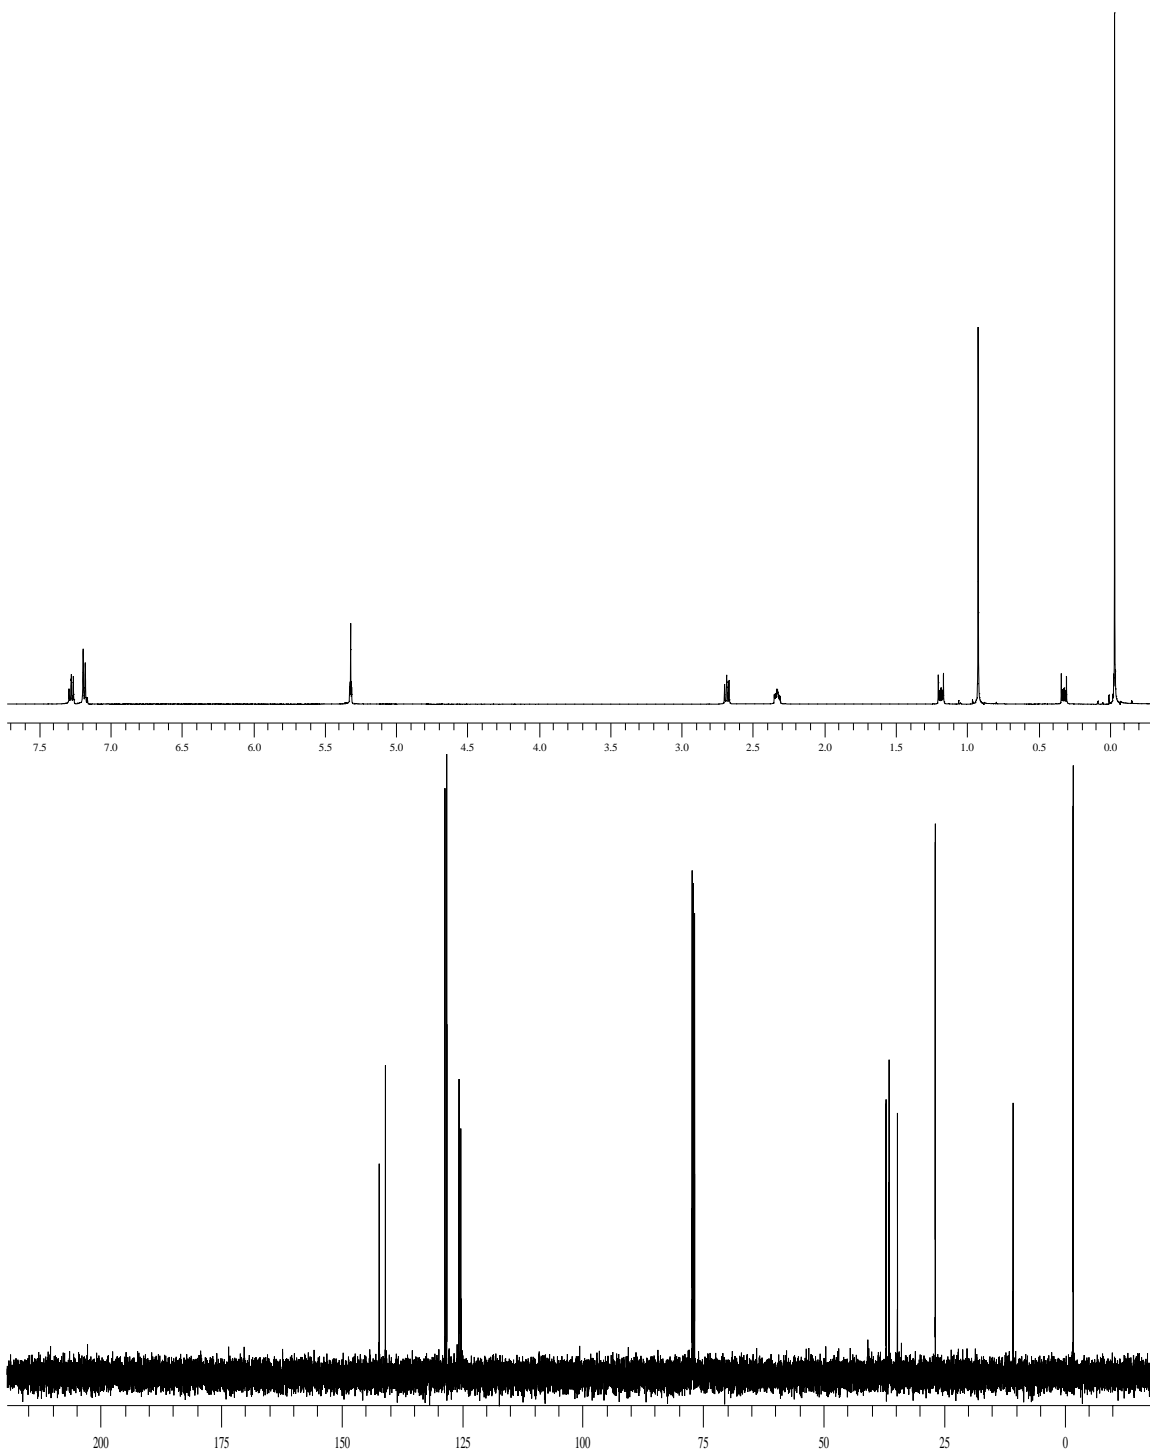

$^1\text{H}$  (500 MHz) and  $^{13}\text{C}$  (126 MHz) of compound 9 ( $\text{CDCl}_3$ )

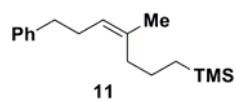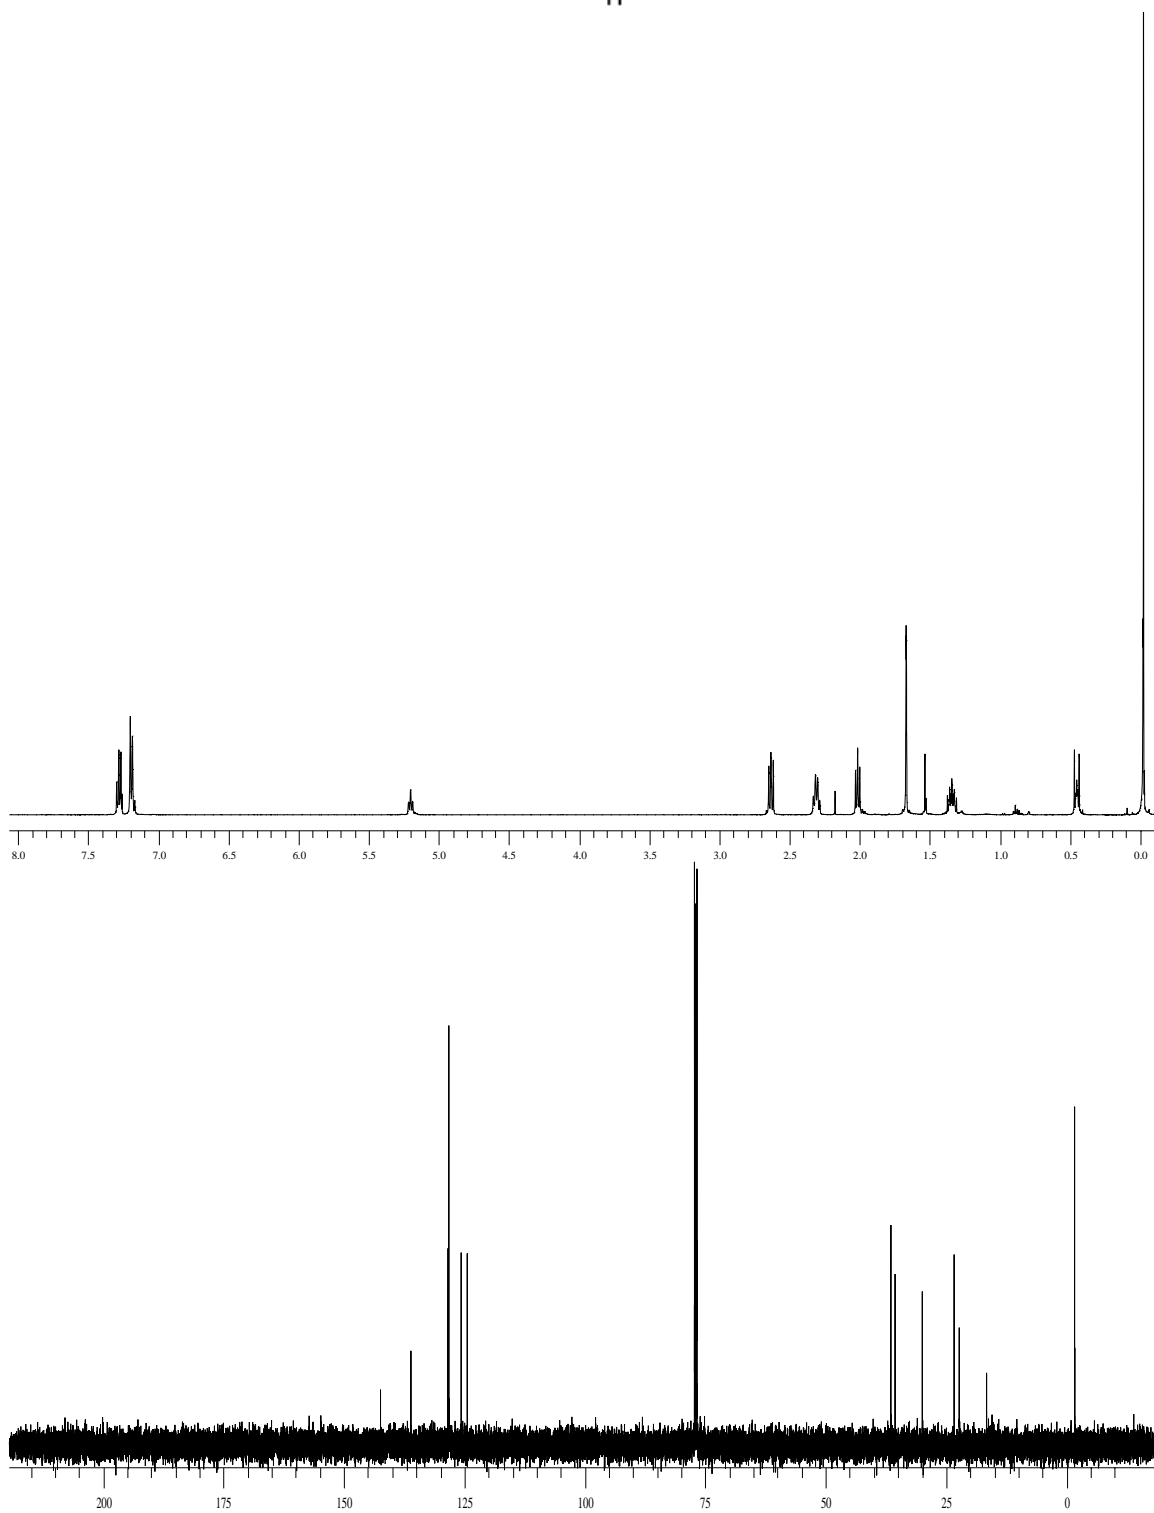

$^1\text{H}$  (500 MHz) and  $^{13}\text{C}$  (126 MHz) of compound **11** ( $\text{CDCl}_3$ )

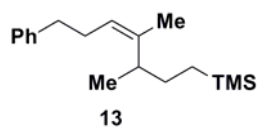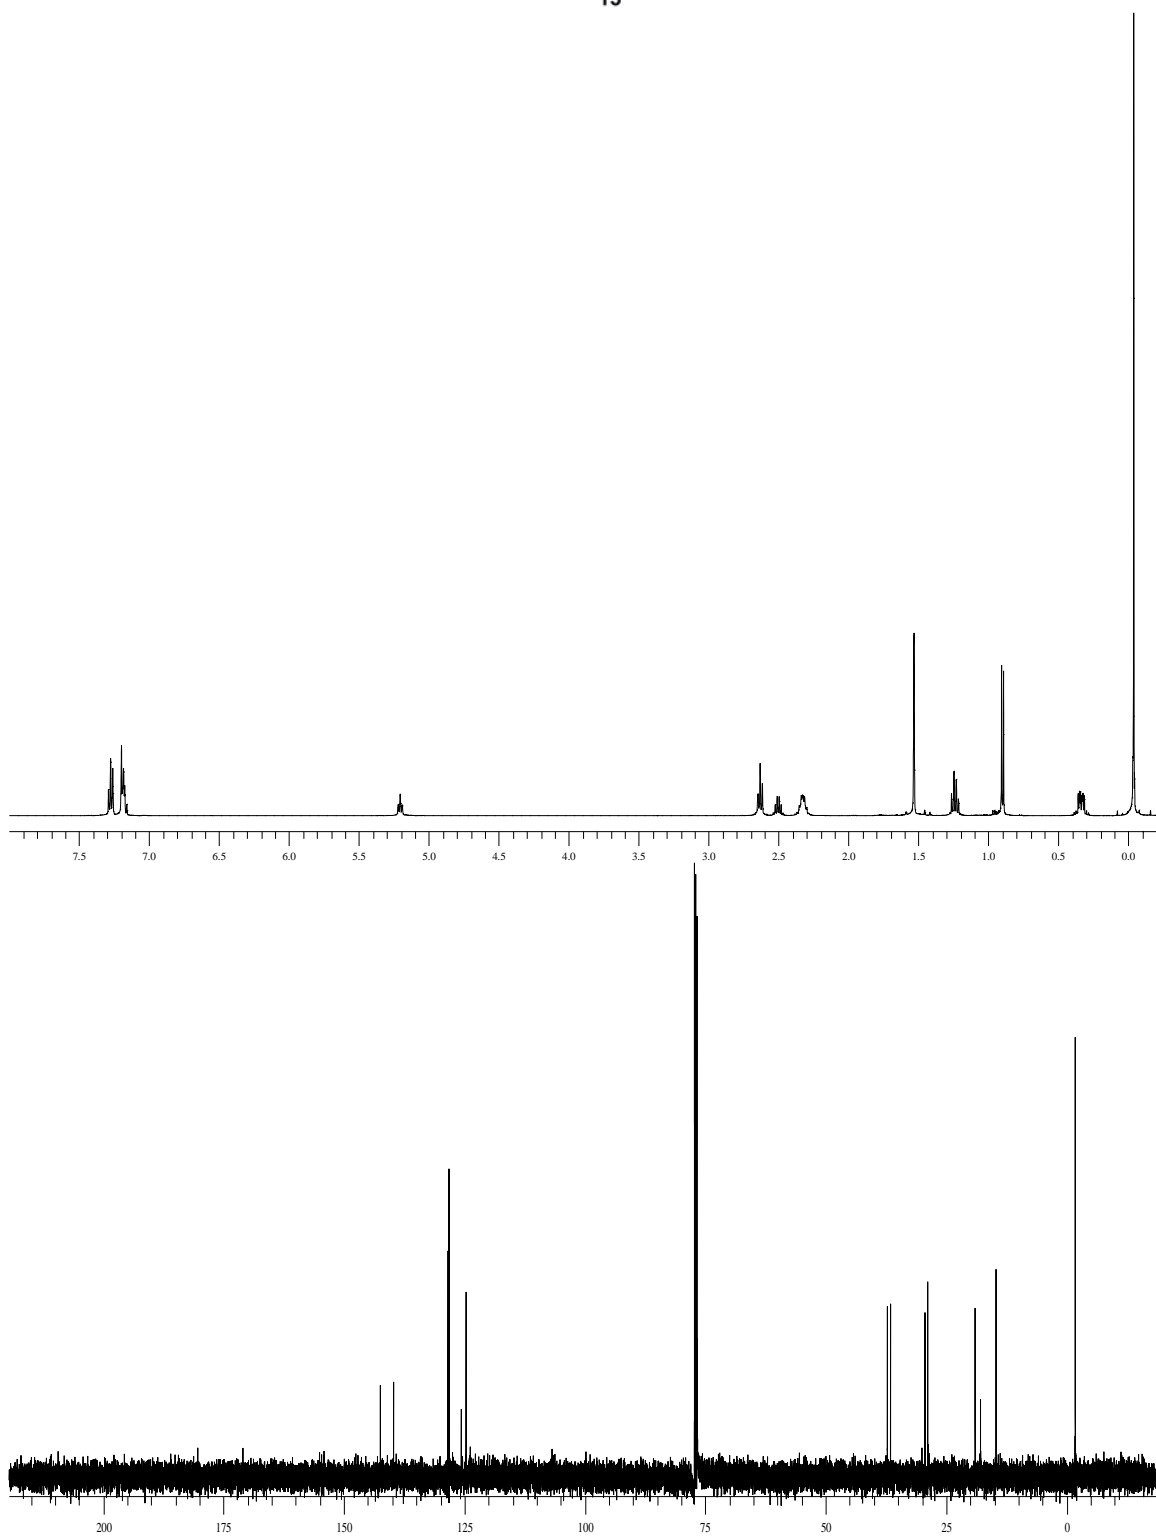

$^1\text{H}$  (500 MHz) and  $^{13}\text{C}$  (126 MHz) of compound **13** ( $\text{CDCl}_3$ )

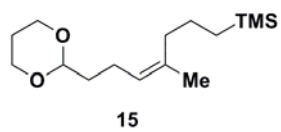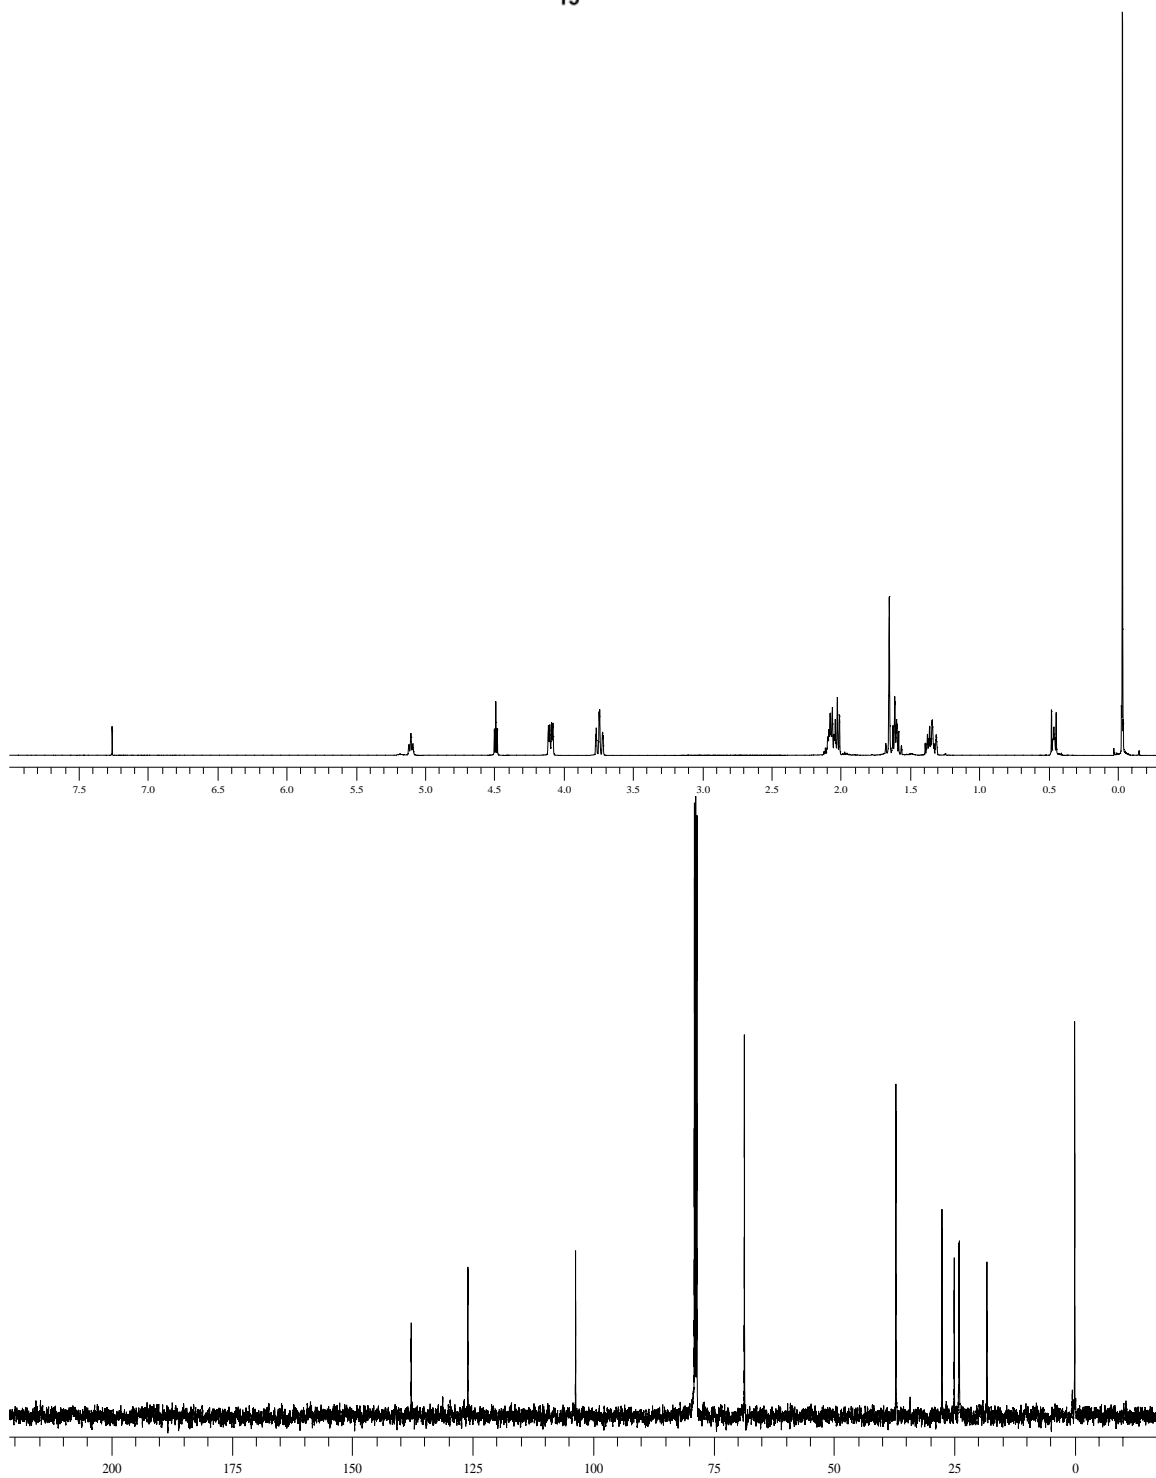

$^1\text{H}$  (500 MHz) and  $^{13}\text{C}$  (126 MHz) of compound **15** ( $\text{CDCl}_3$ )

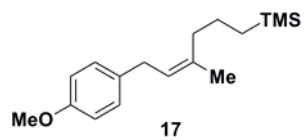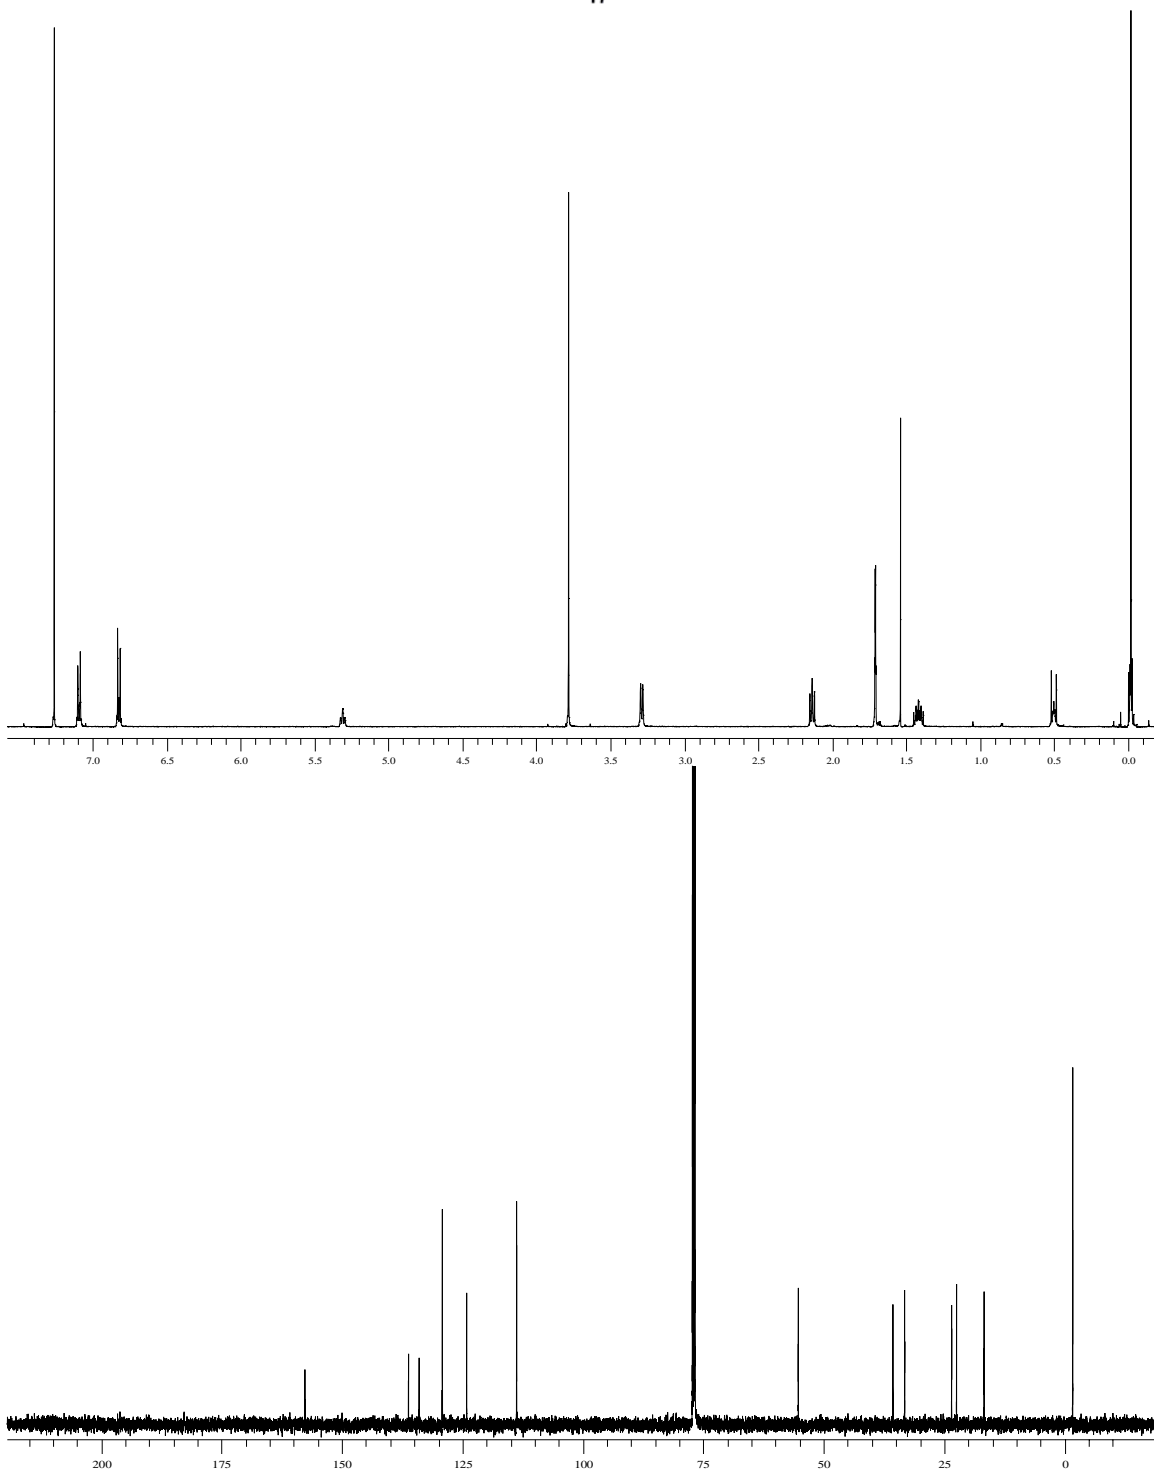

$^1\text{H}$  (500 MHz) and  $^{13}\text{C}$  (126 MHz) of compound **17** ( $\text{CDCl}_3$ )

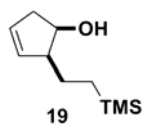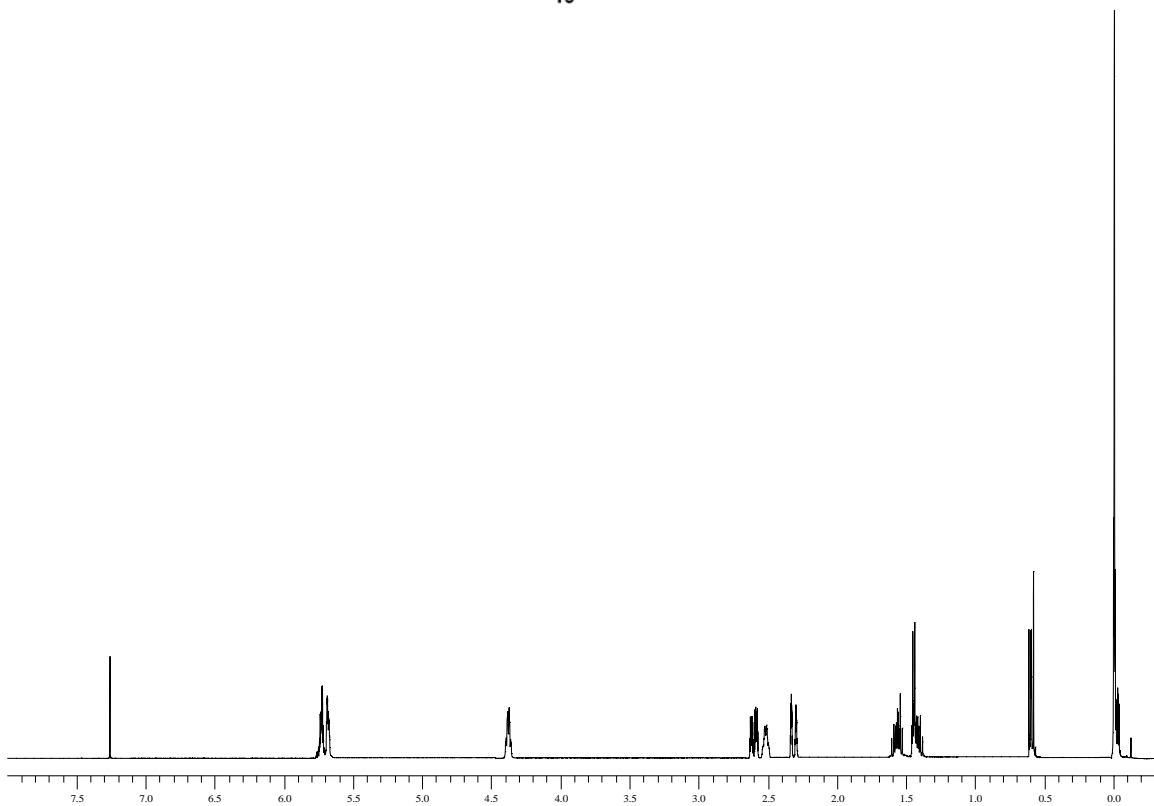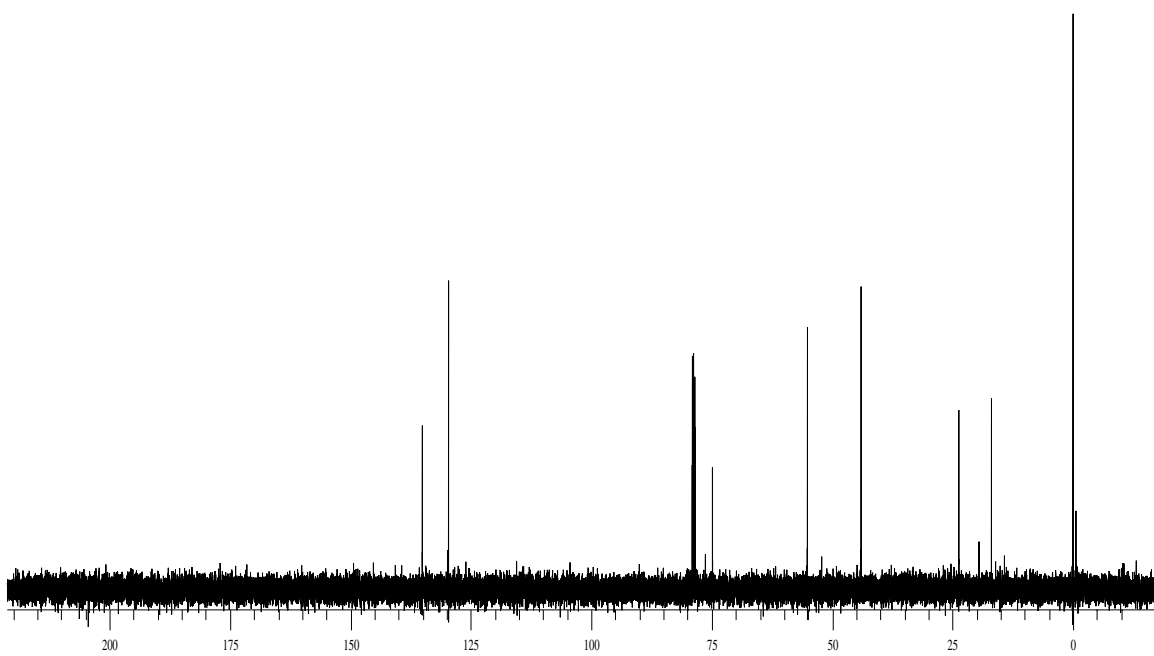

$^1\text{H}$  (500 MHz) and  $^{13}\text{C}$  (126 MHz) of compound **19** ( $\text{CDCl}_3$ )



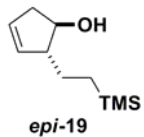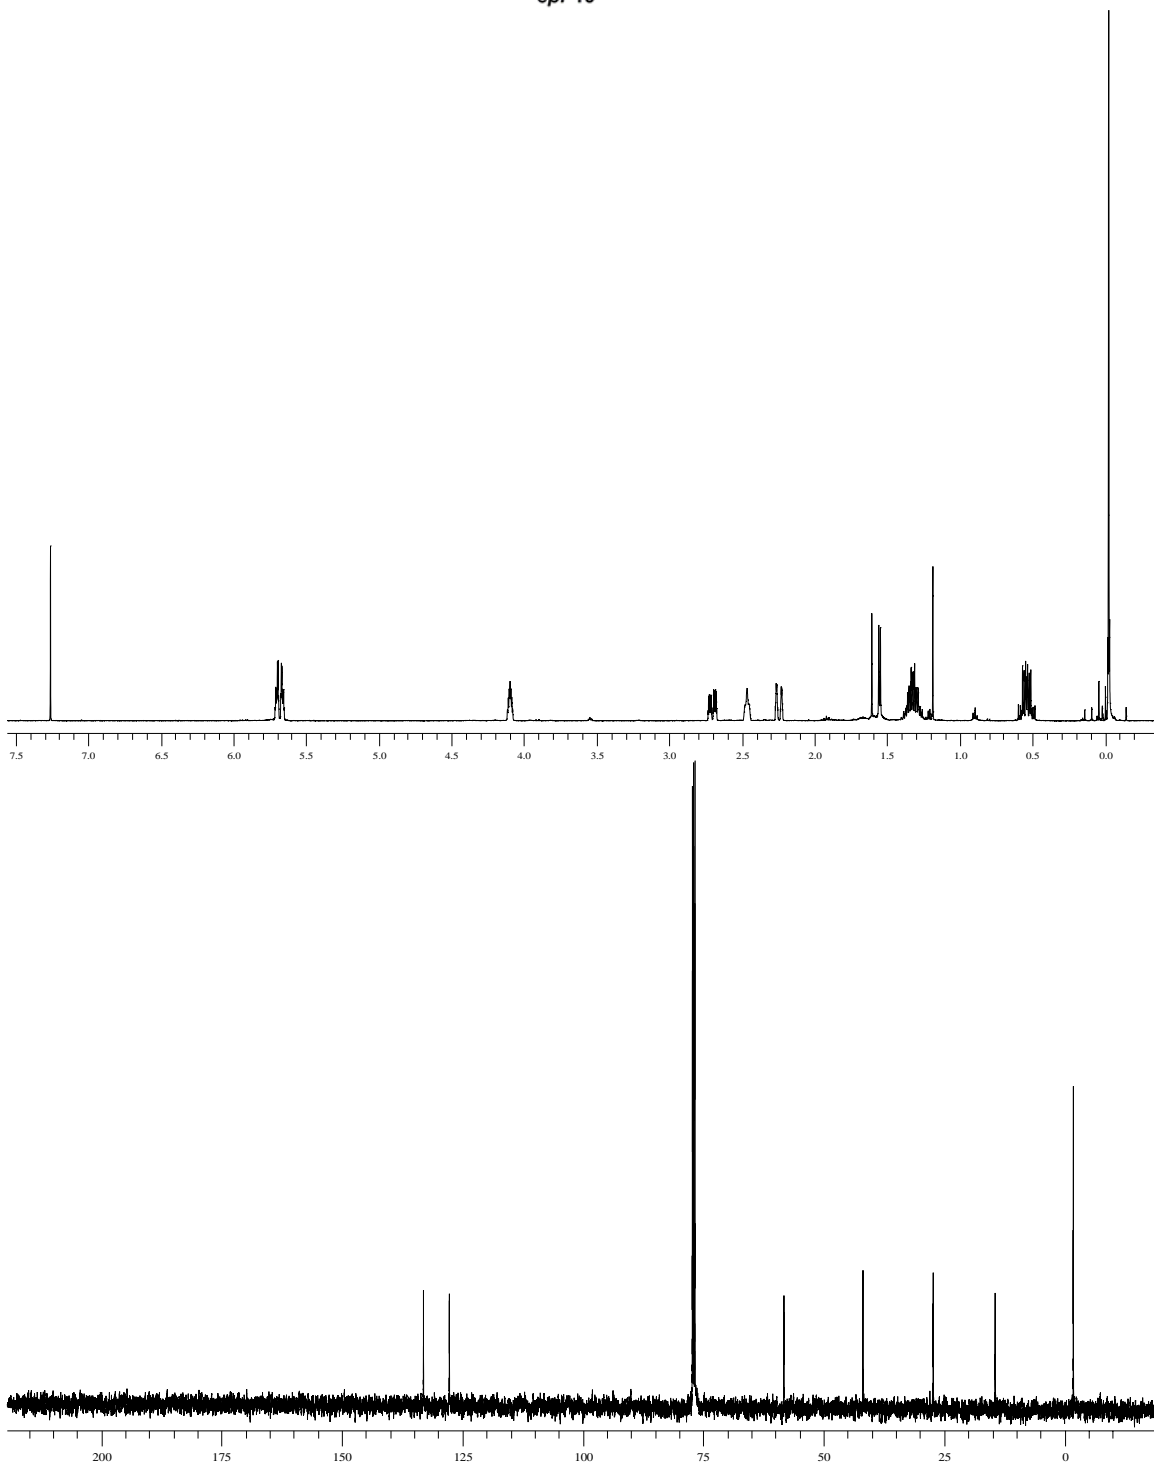

$^1\text{H}$  (500 MHz) and  $^{13}\text{C}$  (126 MHz) of compound *epi-19* ( $\text{CDCl}_3$ )

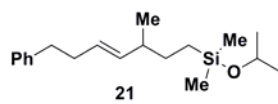

Characterized as a 10:1 mixture of olefin isomers

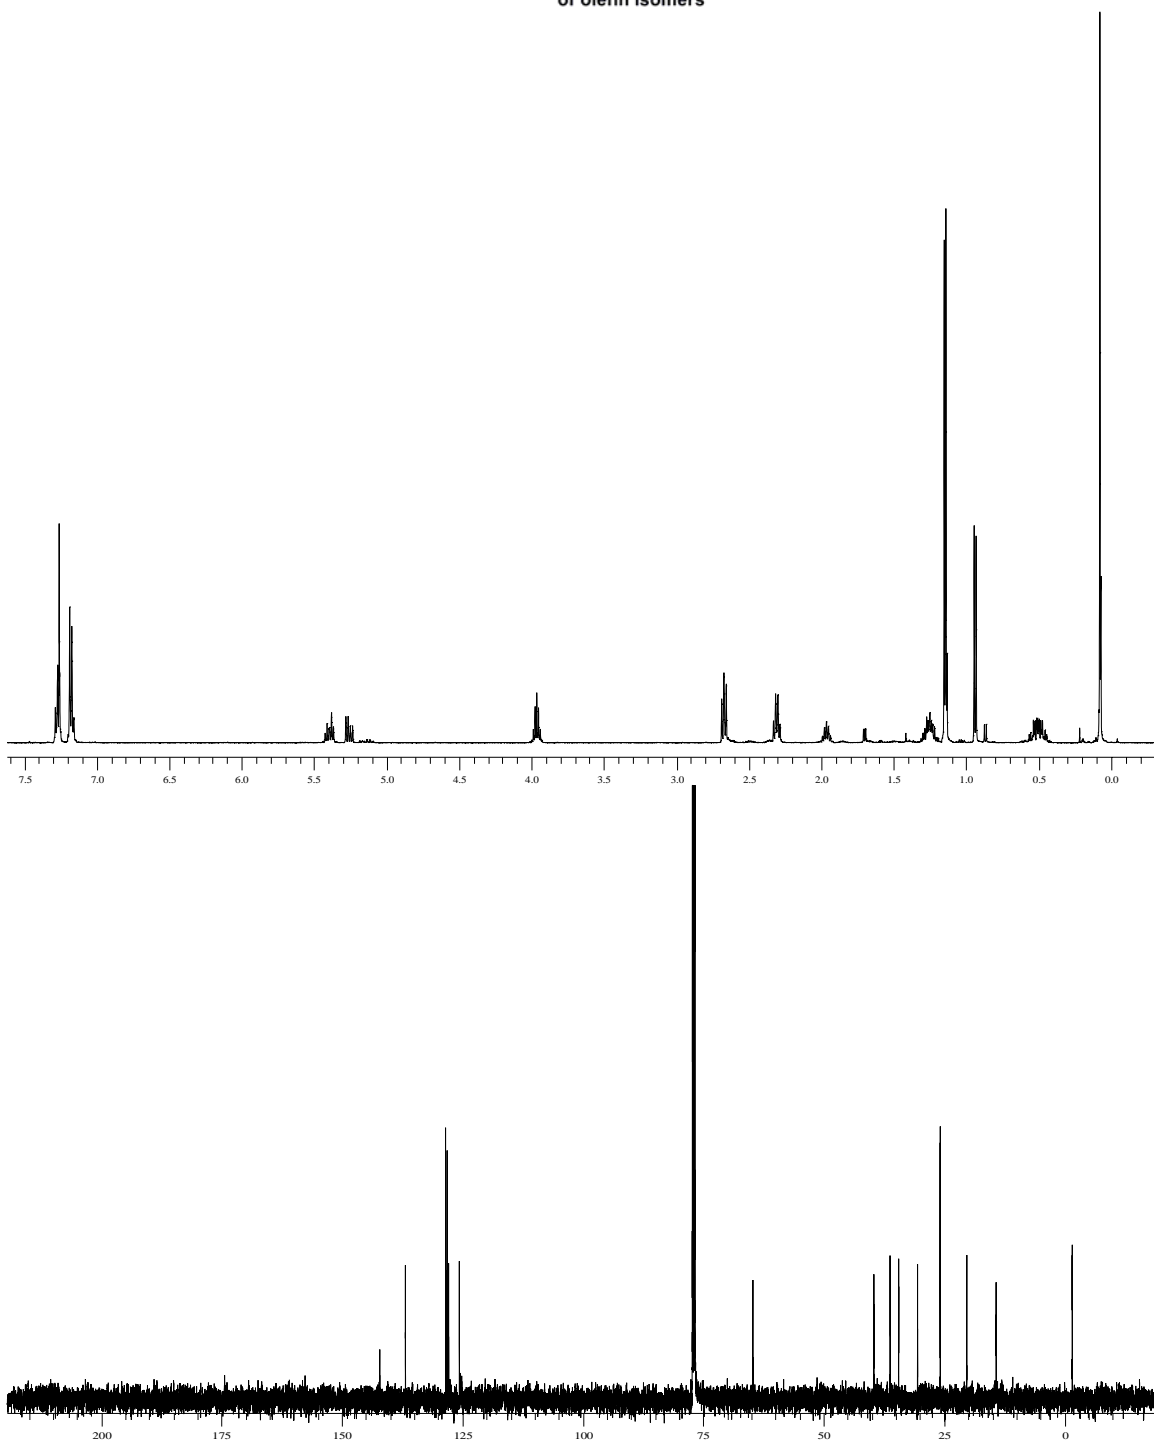

$^1\text{H}$  (500 MHz) and  $^{13}\text{C}$  (126 MHz) of compound **21** ( $\text{CDCl}_3$ )

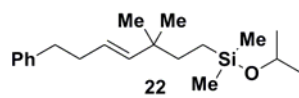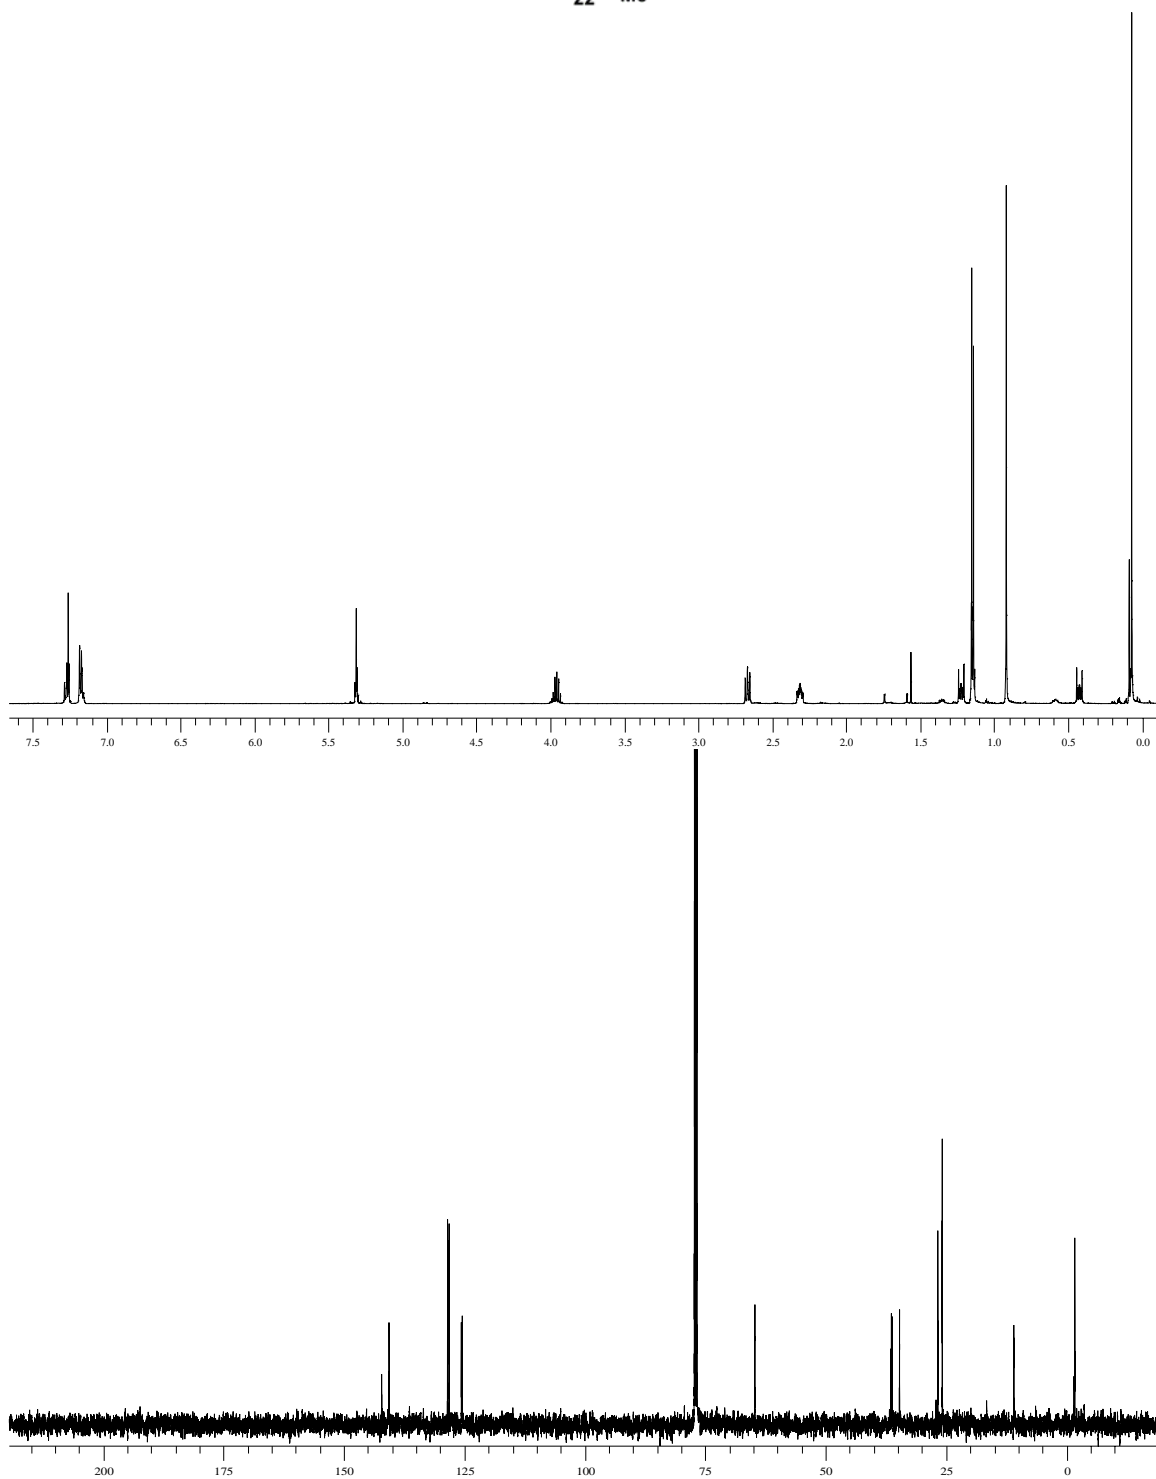

$^1\text{H}$  (500 MHz) and  $^{13}\text{C}$  (126 MHz) of compound **22** ( $\text{CDCl}_3$ )

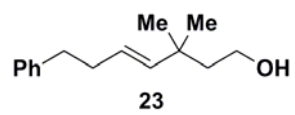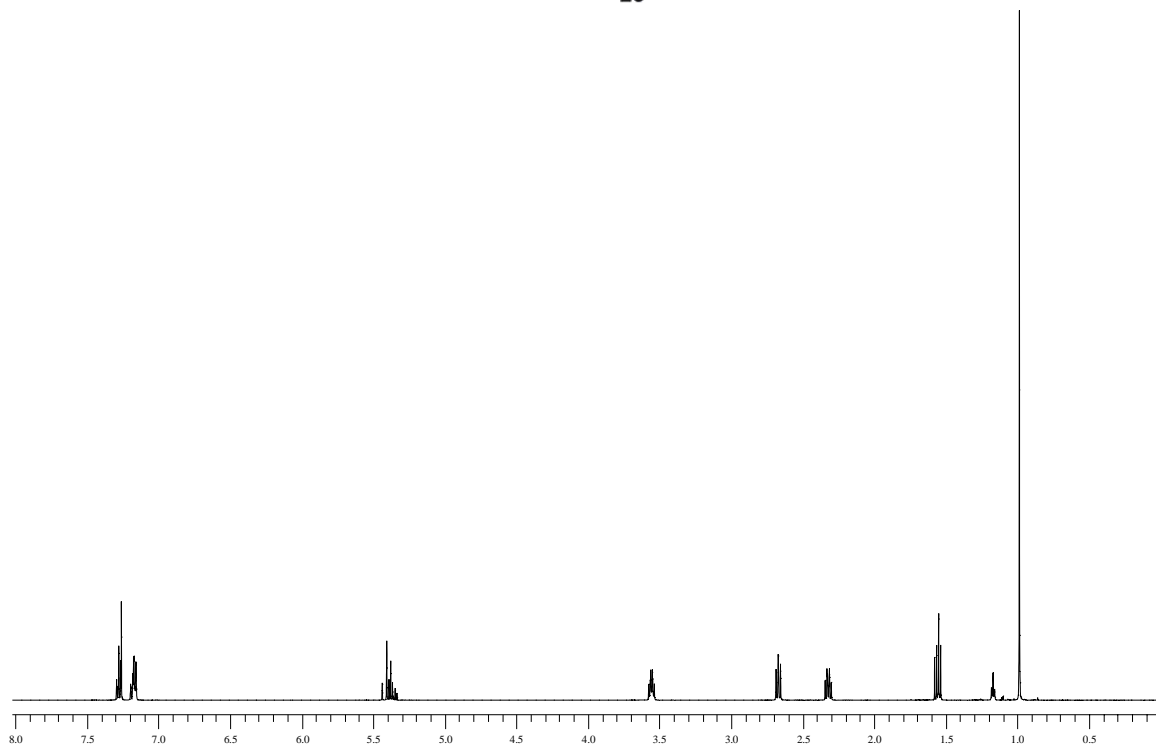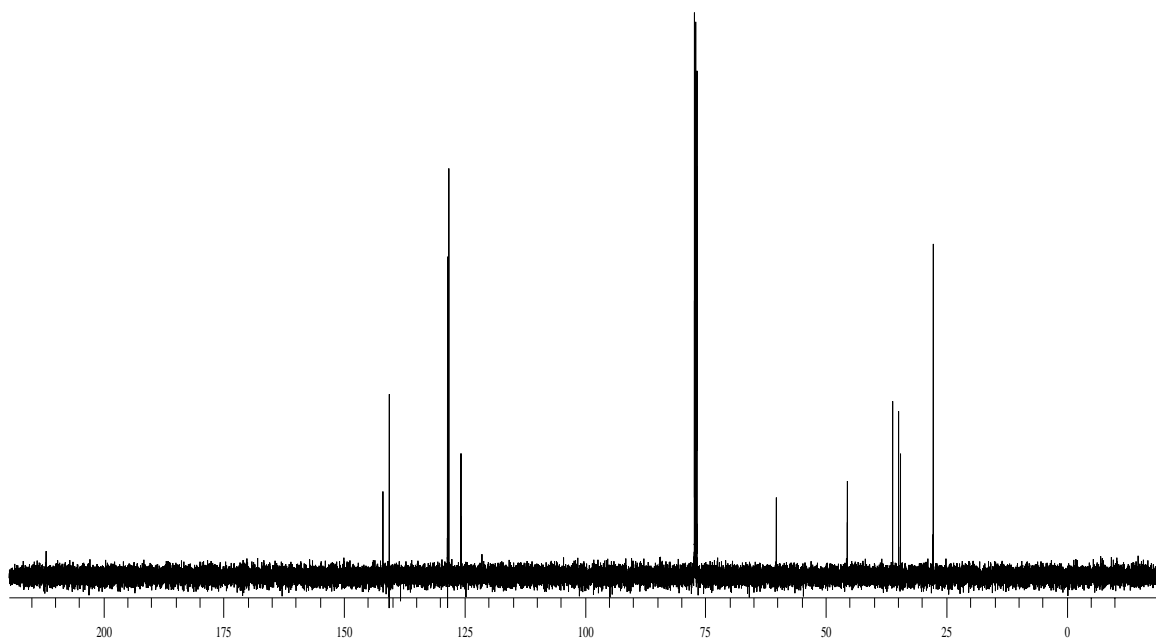

$^1\text{H}$  (500 MHz) and  $^{13}\text{C}$  (126 MHz) of compound **23** ( $\text{CDCl}_3$ )

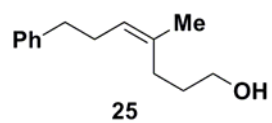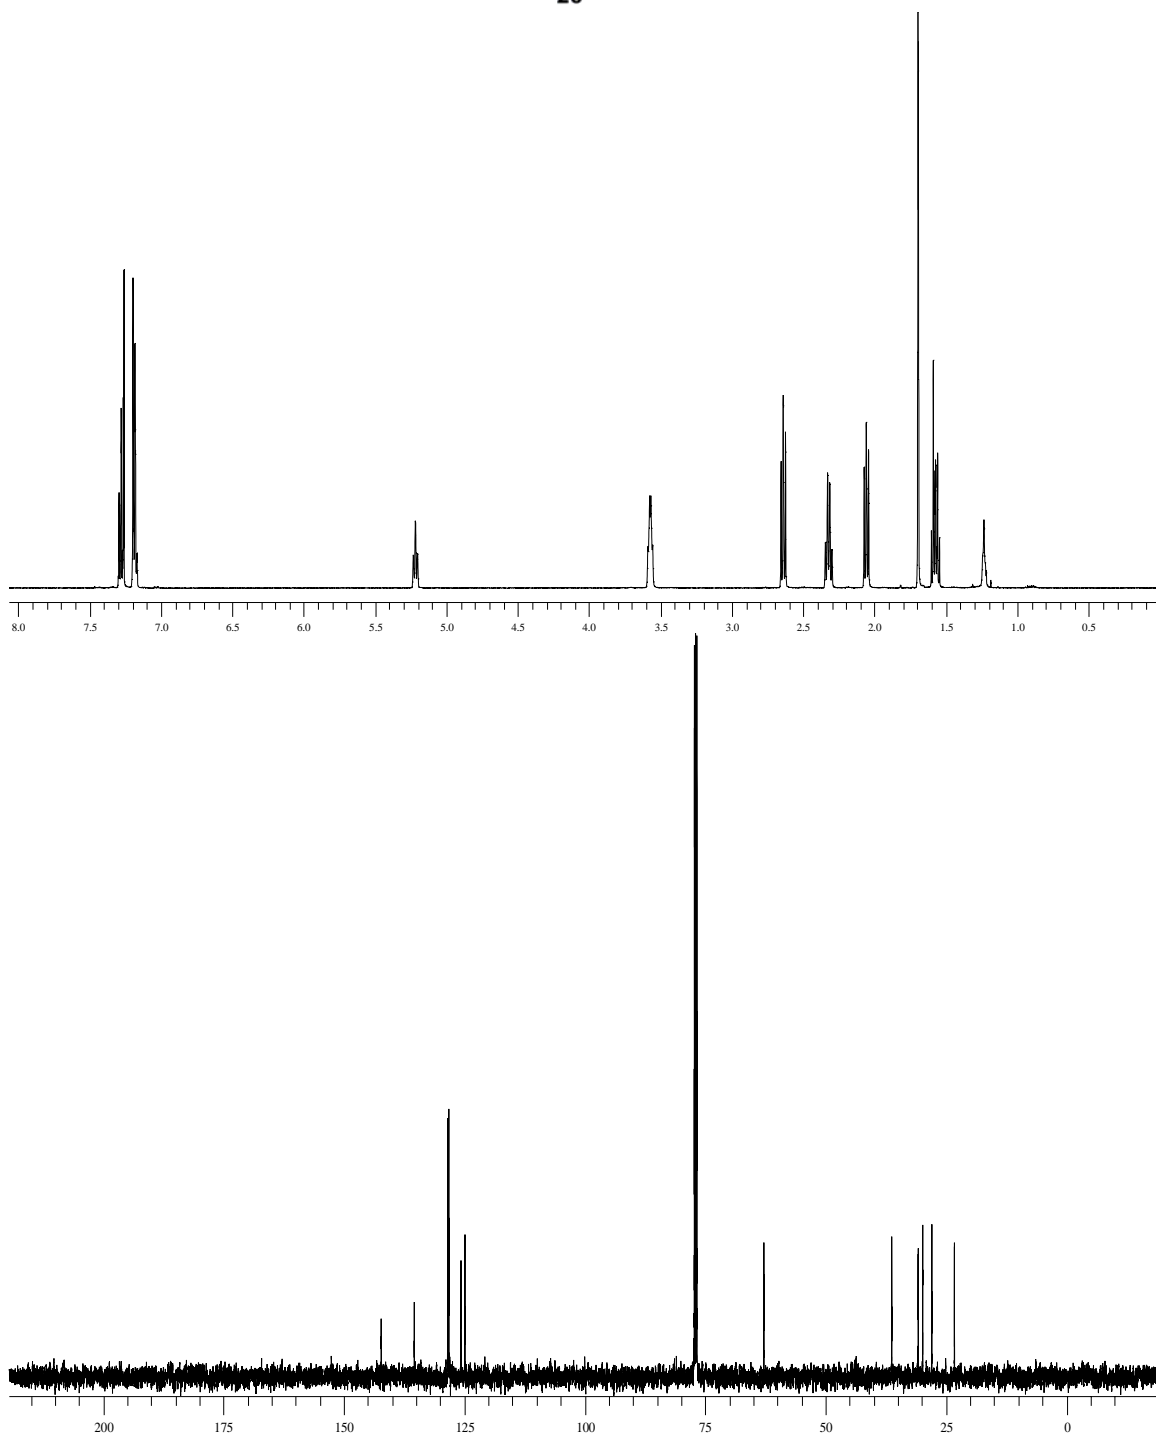

$^1\text{H}$  (500 MHz) and  $^{13}\text{C}$  (126 MHz) of compound **25** ( $\text{CDCl}_3$ )

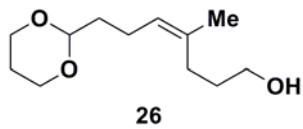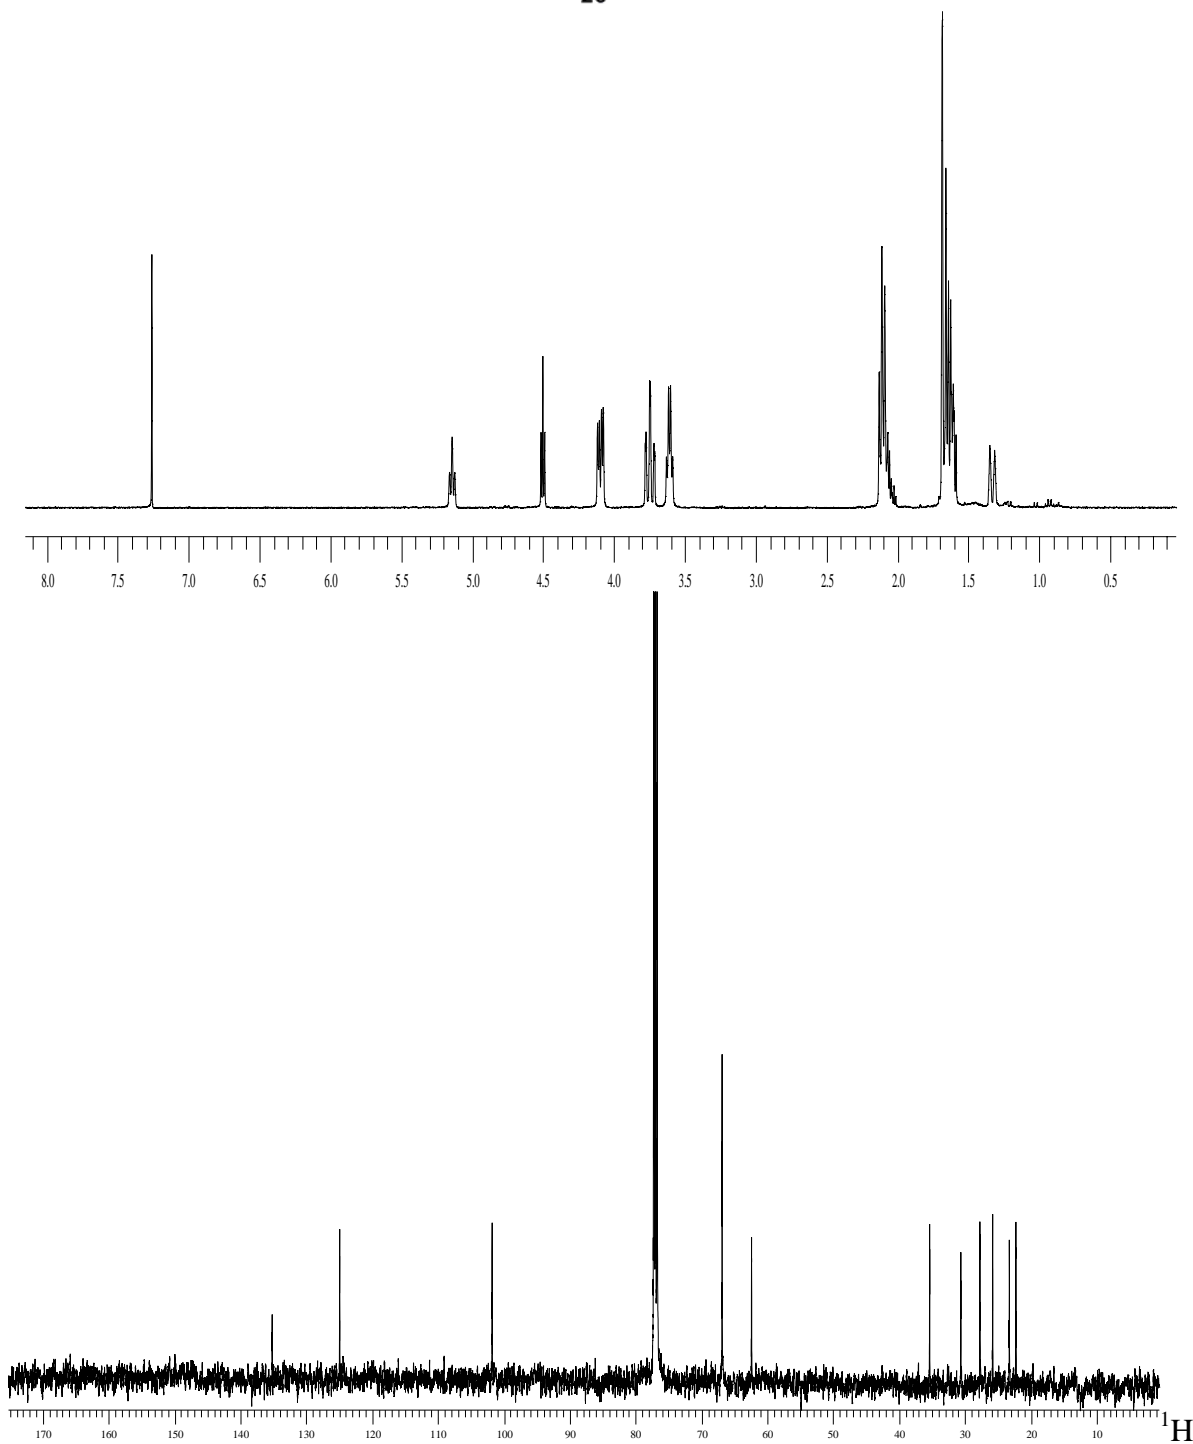

(400 MHz) and  $^{13}\text{C}$  (126 MHz) of compound **26** ( $\text{CDCl}_3$ )

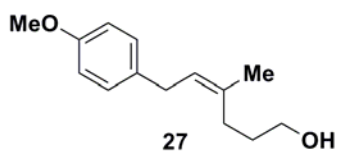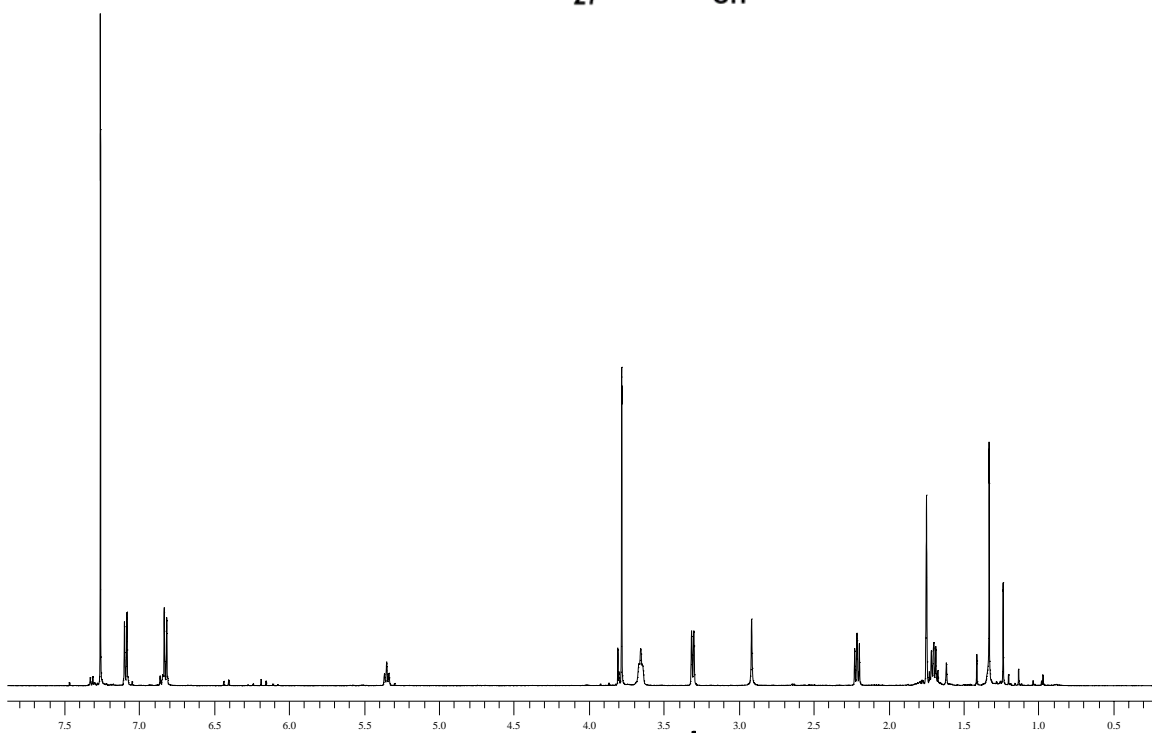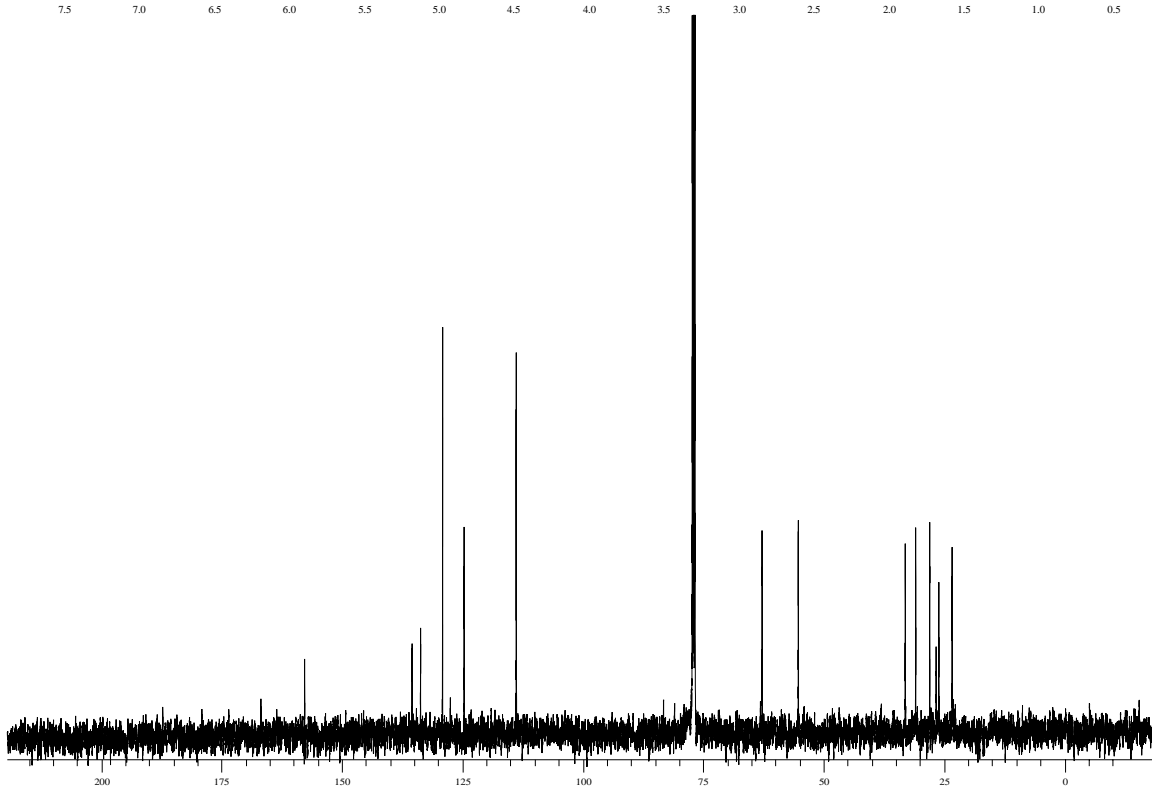

$^1\text{H}$  (500 MHz) and  $^{13}\text{C}$  (126 MHz) of compound **27** ( $\text{CDCl}_3$ )

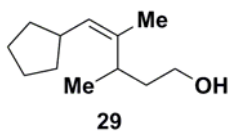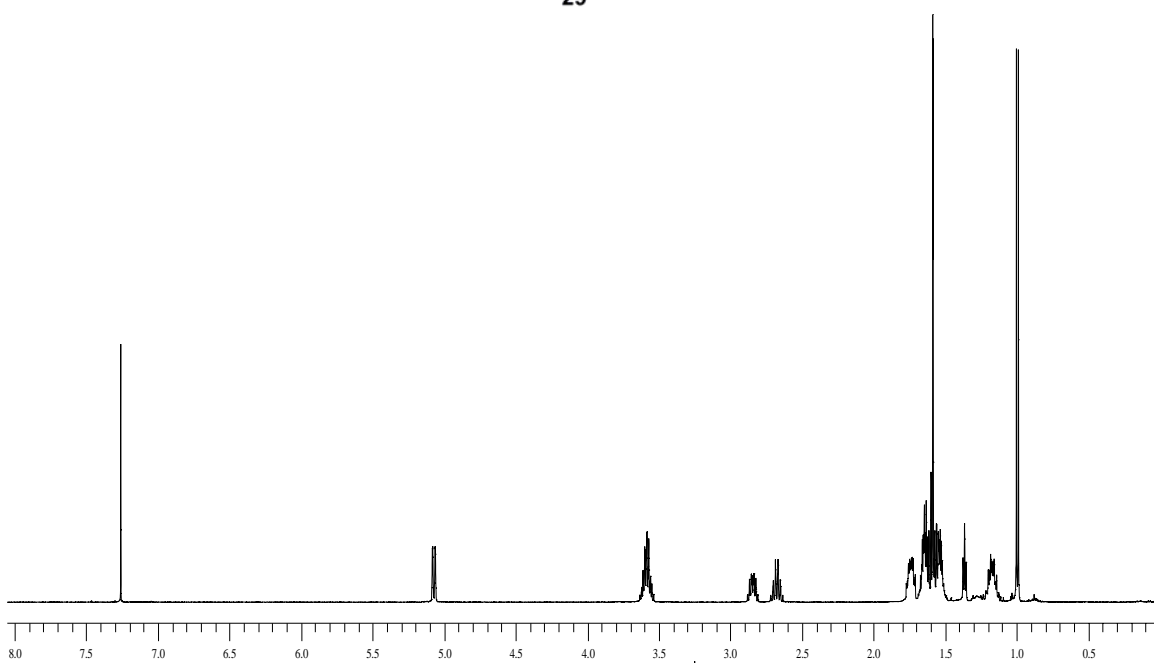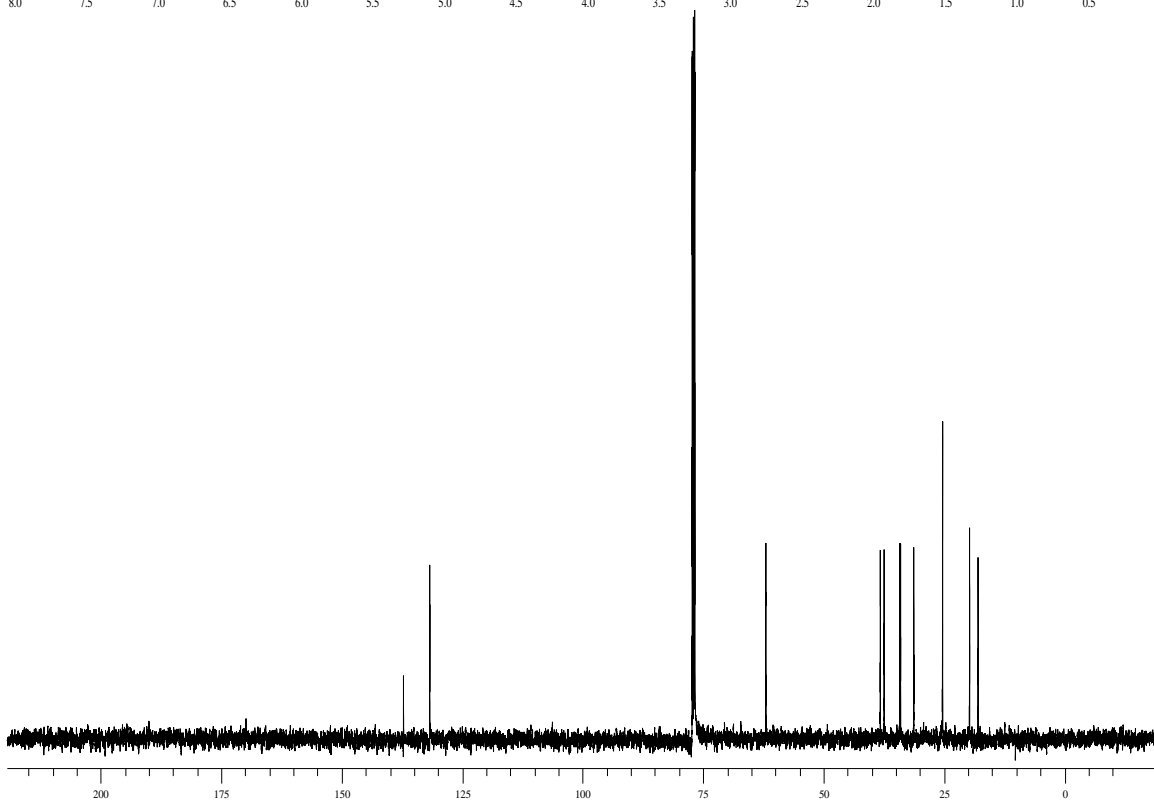

$^1\text{H}$  (500 MHz) and  $^{13}\text{C}$  (126 MHz) of compound **29** ( $\text{CDCl}_3$ )



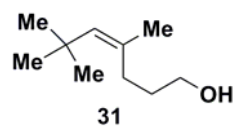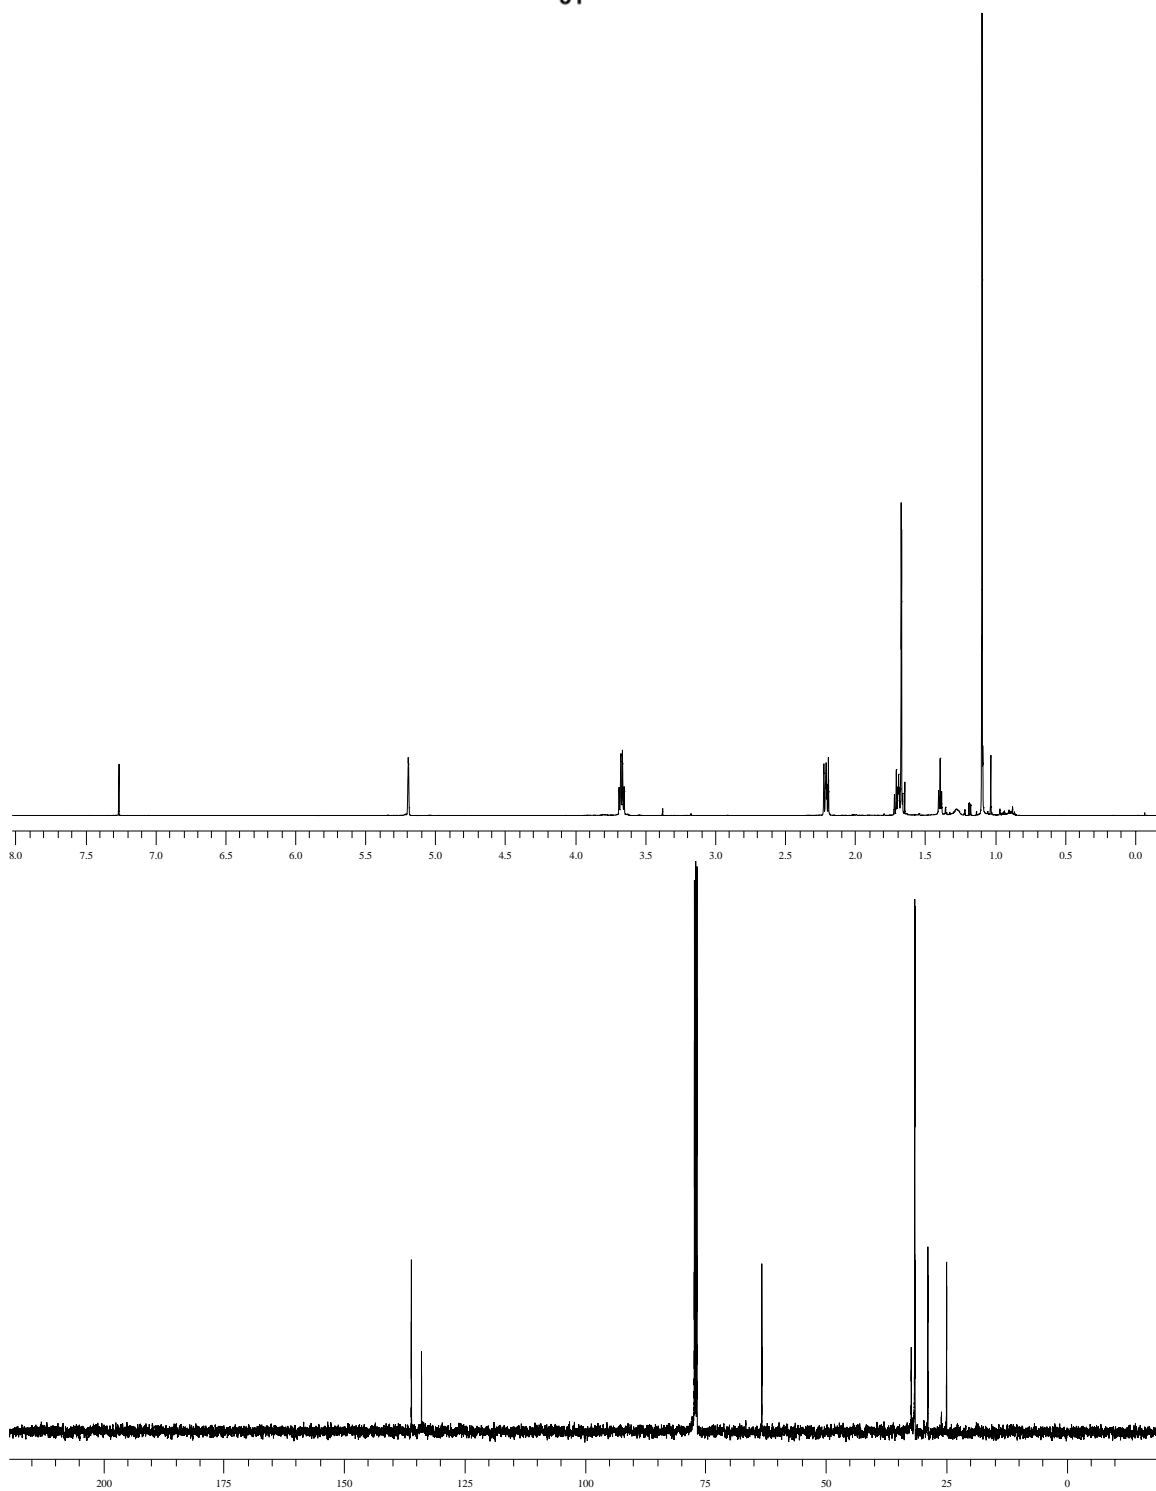

$^1\text{H}$  (500 MHz) and  $^{13}\text{C}$  (126 MHz) of compound **31** ( $\text{CDCl}_3$ )

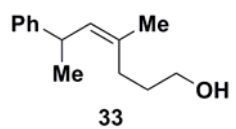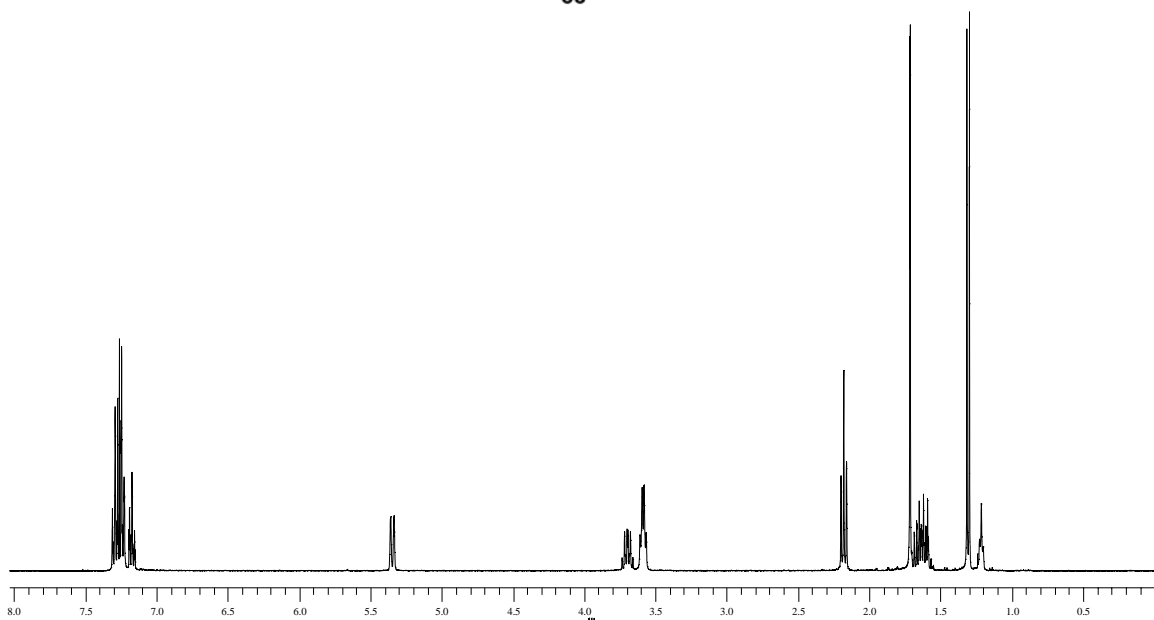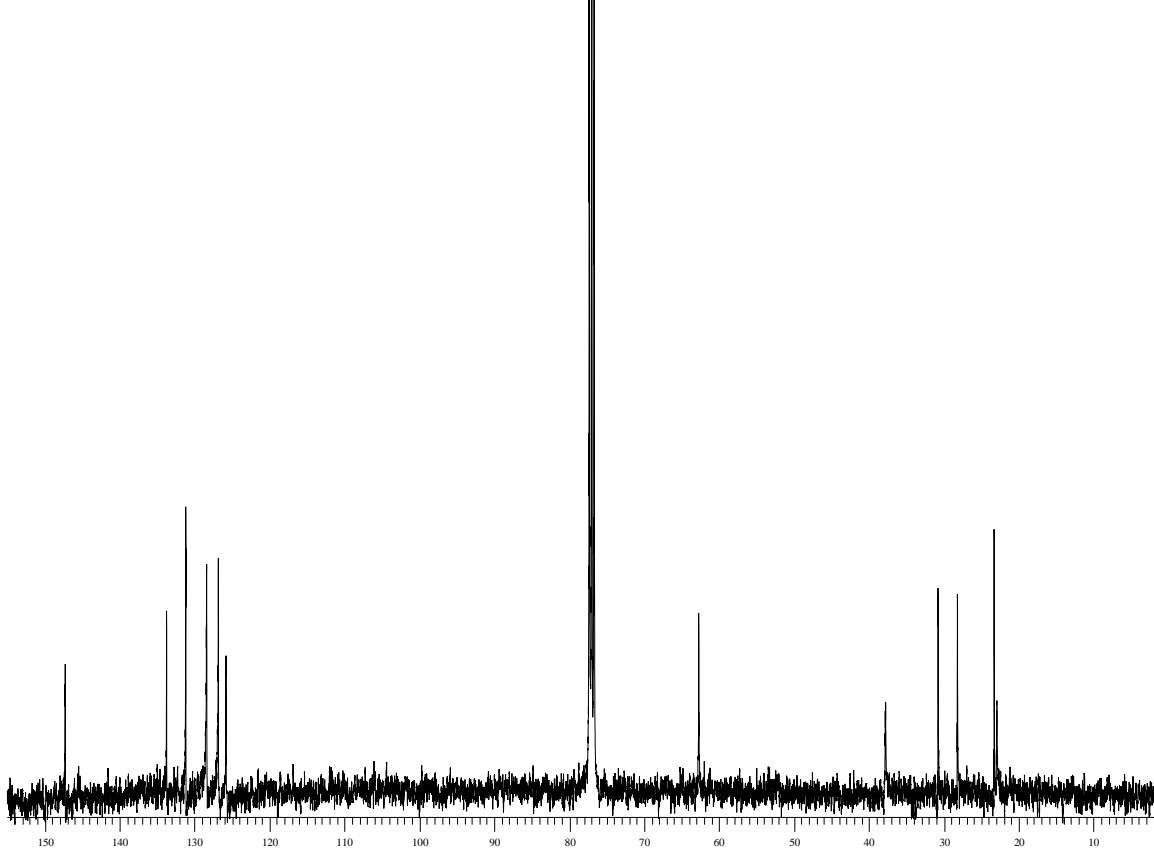

$^1\text{H}$  (500 MHz) and  $^{13}\text{C}$  (100 MHz) of compound **33** ( $\text{CDCl}_3$ )

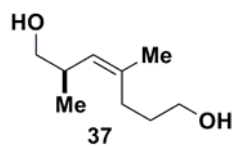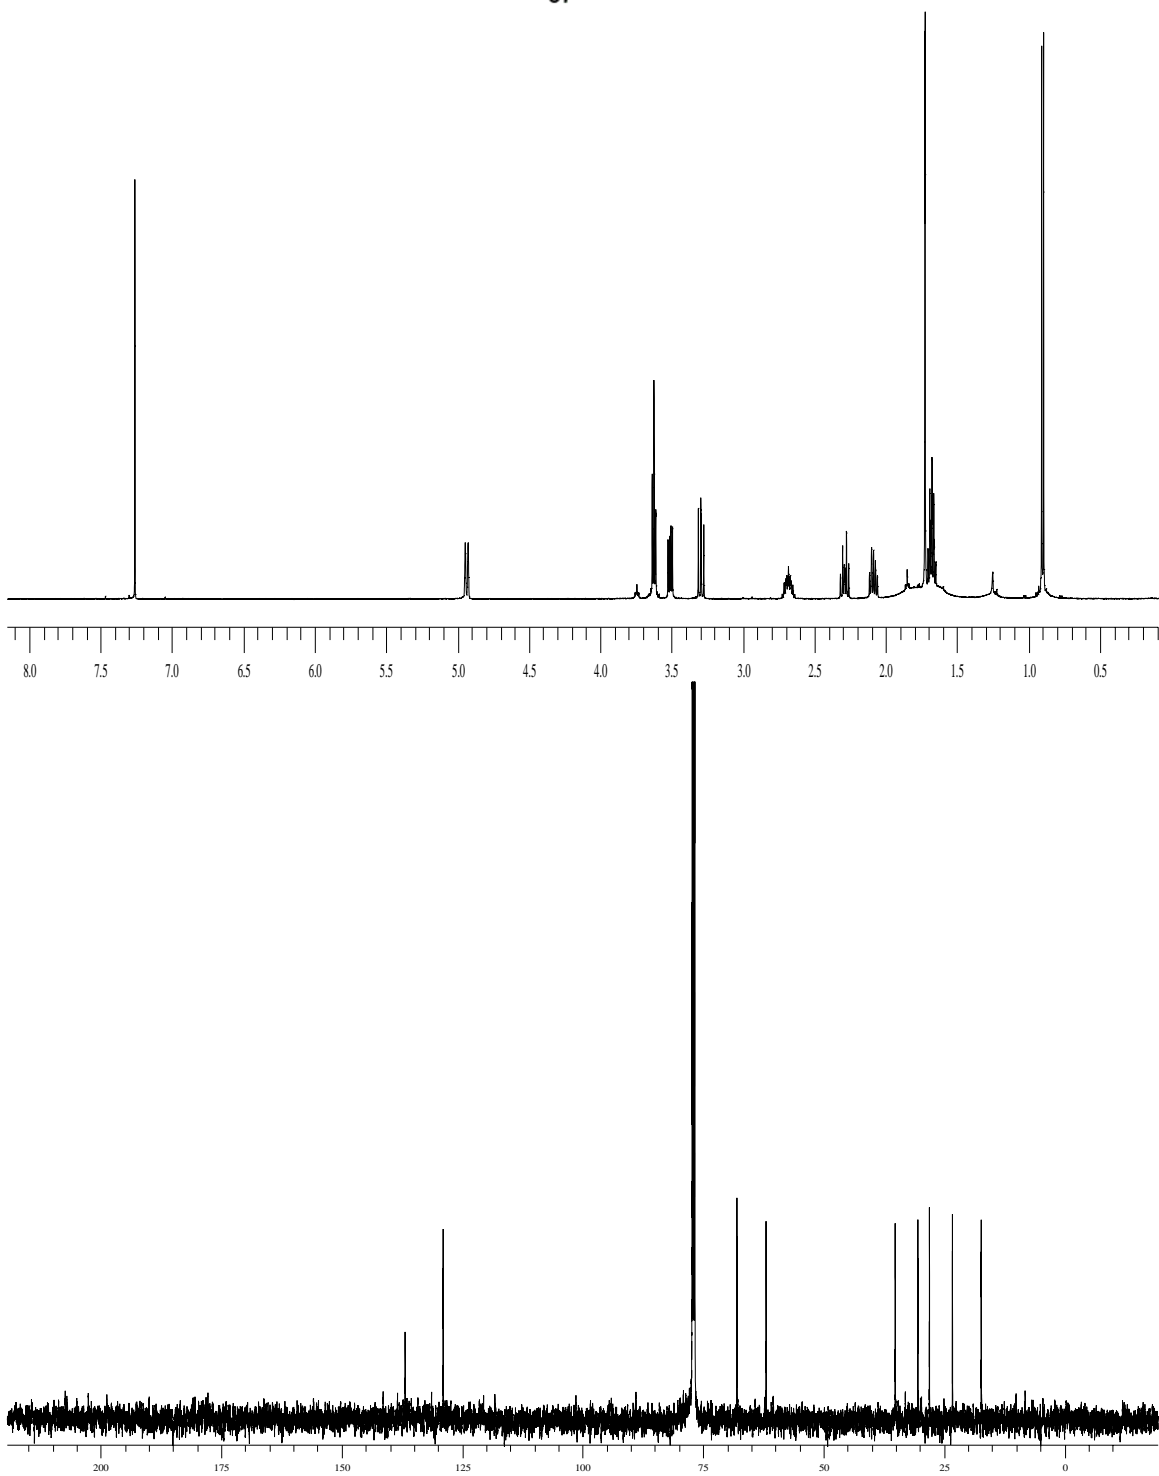

$^1\text{H}$  (500 MHz) and  $^{13}\text{C}$  (126 MHz) of compound **37** ( $\text{CDCl}_3$ )
